# Supplementary material for: Metal-free electrochemical oxidative intramolecular cyclization ofN-propargylbenzamides: facile access to oxazole ketals
Source: Royal Society of Chemistry journal article supplement (doi:10.1039/d3qo00662j), 2023-01-01
Supplement: d3qo00662j1.pdf [file d3qo00662j1.pdf]

# Supplementary Information

## Metal-free electrochemical oxidative intramolecular cyclization of *N*-propargylbenzamides: Facile access to oxazole ketals

Huaxin Zhang,<sup>a</sup> Yongge Xiong,<sup>a</sup> Mu-Jia Luo,<sup>\*a</sup> Ruchun Yang,<sup>\*a</sup> Jiang Bai,<sup>a</sup> Xian-  
Rong Song<sup>a</sup> and Qiang Xiao<sup>\*a</sup>

---

<sup>a</sup> Key Laboratory of Organic Chemistry of Jiangxi Province, Jiangxi Science & Technology  
Normal University, Nanchang, 330013, China. E-mail: [luomjchem@163.com](mailto:luomjchem@163.com); E-mail:  
[ouyangruchun@163.com](mailto:ouyangruchun@163.com); E-mail: [xiaoqiang@tsinghua.org.cn](mailto:xiaoqiang@tsinghua.org.cn).

### List of Contents

- (A) Typical Experimental Procedure
- (B) Analytical data
- (C) Spectra (NMR Spectra)
- (D) The crystal structure of compound 2m.

## (A) Typical Experimental Procedure

### (a) General

All reagents were purchased from commercial sources and used without further treatment, unless otherwise indicated. Methanol (CH<sub>3</sub>OH) was purchased from Adamas Company, safe dry, water < 50 ppm. <sup>1</sup>H and <sup>13</sup>C NMR spectra were recorded on Bruker 400 MHz spectrometers, chemical shifts are given in parts per million (ppm) relative to standard tetramethylsilane (0.00 ppm for <sup>1</sup>H NMR) or residual solvent peaks for <sup>13</sup>C NMR. HRMS was obtained using a Q-TOF instrument equipped with ESI source. Standard column chromatography was performed on 200-300 mesh silica gel, using flash column chromatography techniques. The instrument for electrolysis is DC power source (PM3005B) (made in China). Cyclic voltammograms were obtained on a CHI 605E potentiostat. The anode electrode is graphite rod (Φ6 mm×80 mm) and cathode electrode is platinum electrodes (1.0×1.0 cm<sup>2</sup>).

### (b) General procedures for electrochemical 5-*exo-dig* radical cyclization of N-propargylbenzamides.

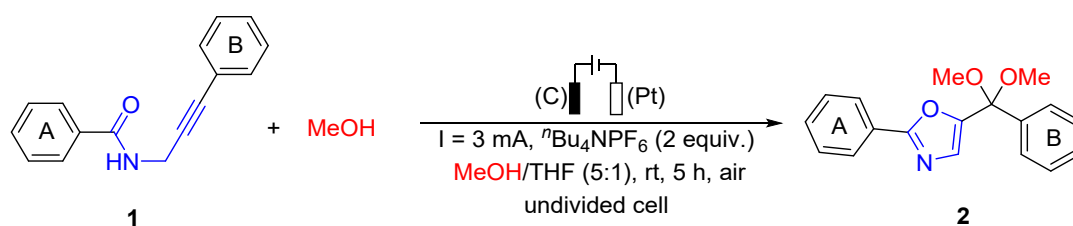

To an undivided three-necked bottle (25 mL) were added **1** (0.2 mmol), nBu<sub>4</sub>NPF<sub>6</sub> (0.4 mmol) and CH<sub>3</sub>OH/THF (5:1, 6 mL). The bottle was equipped with platinum electrodes (1.0×1.0 cm<sup>2</sup>) as cathode and graphite rod electrode as anode under air. The reaction mixture was stirred and electrolyzed at a constant current of 3 mA at room temperature for 5 h until complete consumption of **1** as monitored by TLC analysis. After the reaction was finished and filtered and concentrated in vacuum. The resulting residue was purified by silica gel column chromatography (hexane/ethyl acetate).

### (c) Cyclic voltammogram analysis

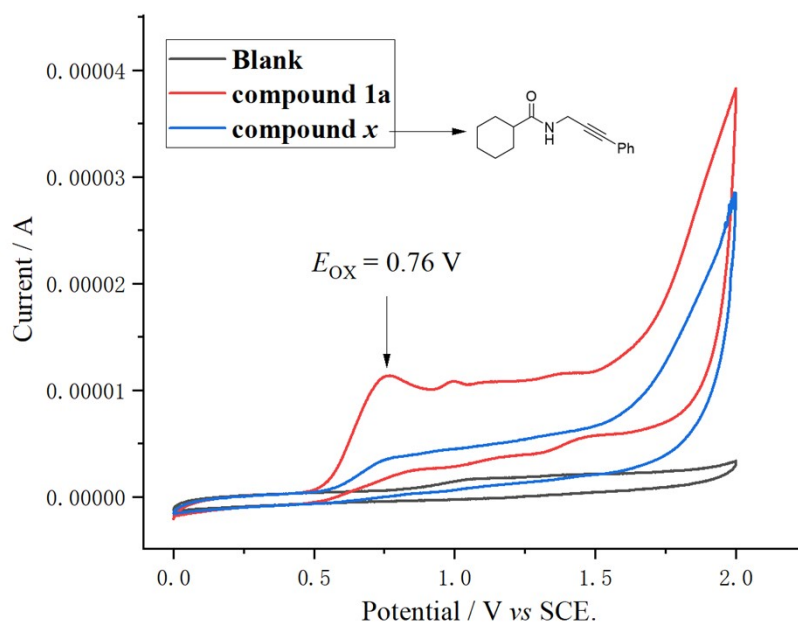

**Figure S1. Cyclic voltammogram curves (0-2.0 V).** Using GC disk as working electrode, Pt plate, and SCE as counter and reference electrode at 50 mV/s scan rate. **1** (0.02 M),  $\text{Bu}_4\text{NBF}_4$  (0.1 M) and MeCN (10 mL). The inert compound *N*-(3-phenylprop-2-yn-1-yl)cyclohexanecarboxamide has no oxidative potential peak in the range of 0-2.0 V.

### (d) experimental setup

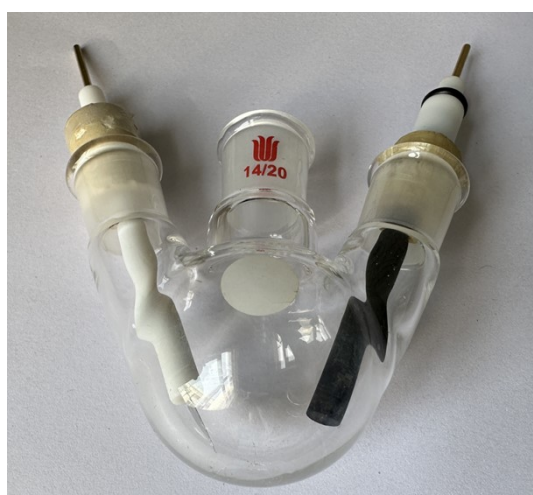

## (B) Analytical data

### 5-(Dimethoxy(phenyl)methyl)-2-phenyloxazole (2a):

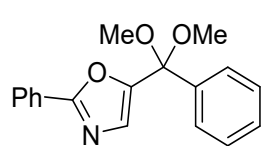

White solid, 75%, 44.3 mg, mp 61-62 °C; <sup>1</sup>H NMR (400 MHz, CDCl<sub>3</sub>) δ 7.97 – 7.91 (m, 2H), 7.58 (d, *J* = 7.0 Hz, 2H), 7.43 – 7.29 (m, 7H), 3.22 (s, 6H). <sup>13</sup>C NMR (100 MHz, CDCl<sub>3</sub>) δ 161.8, 151.0, 138.6, 130.4, 128.7, 128.5, 128.2, 127.3, 127.2, 127.1, 126.4, 99.9, 49.6. HRMS (ESI): *m/z* [M+H]<sup>+</sup> calcd for C<sub>18</sub>H<sub>18</sub>NO<sub>3</sub>: 296.1281; found: 296.1289.

### 5-(Dimethoxy(phenyl)methyl)-2-(*p*-tolyl)oxazole (2b) :

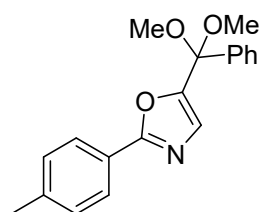

White solid, 58%, 35.8 mg, mp 60-62 °C; <sup>1</sup>H NMR (400 MHz, CDCl<sub>3</sub>) δ 7.82 (d, *J* = 8.1 Hz, 2H), 7.58 (d, *J* = 7.0 Hz, 2H), 7.41 – 7.31 (m, 3H), 7.27 (s, 1H), 7.19 (d, *J* = 7.9 Hz, 2H), 3.21 (s, 6H), 2.36 (s, 3H). <sup>13</sup>C NMR (100 MHz, CDCl<sub>3</sub>) δ 162.0, 150.6, 140.7, 138.7, 129.4, 128.5, 128.2, 127.1×2, 126.4, 124.6, 99.9, 49.6, 21.5. HRMS (ESI): *m/z* [M+H]<sup>+</sup> calcd for C<sub>19</sub>H<sub>20</sub>NO<sub>3</sub>: 310.1438; found: 310.1435.

### 2-(4-Chlorophenyl)-5-(dimethoxy(phenyl)methyl)oxazole (2c) :

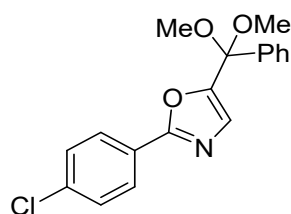

White solid, 51%, 33.6 mg, mp 76-77 °C; <sup>1</sup>H NMR (400 MHz, CDCl<sub>3</sub>) δ 7.86 (d, *J* = 8.6 Hz, 2H), 7.57 (d, *J* = 6.9 Hz, 2H), 7.41 – 7.32 (m, 5H), 7.30 (s, 1H), 3.21 (s, 6H). <sup>13</sup>C NMR (100 MHz, CDCl<sub>3</sub>) δ 160.9, 151.3, 138.5, 136.5, 129.0, 128.6, 128.2, 127.7, 127.3, 127.1, 125.8, 99.8, 49.6. HRMS (ESI): *m/z* [M+H]<sup>+</sup> calcd for C<sub>18</sub>H<sub>17</sub>ClNO<sub>3</sub>: 330.0892; found: 330.0898.

### 2-(4-Bromophenyl)-5-(dimethoxy(phenyl)methyl)oxazole (2d) :

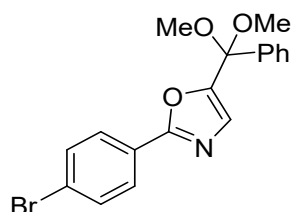

White solid, 35%, 26.1 mg, mp 79-81 °C; <sup>1</sup>H NMR (400 MHz, DMSO) δ 7.75 (d, *J* = 8.5 Hz, 2H), 7.68 (d, *J* = 8.5 Hz, 2H), 7.52 (d, *J* = 7.3 Hz, 2H), 7.46 – 7.33 (m, 4H), 3.14 (s, 6H). <sup>13</sup>C NMR (100 MHz, DMSO) δ 160.4, 151.5, 138.7, 132.7, 129.2, 128.9, 128.2, 127.6, 127.1, 126.1, 124.8, 99.8, 49.7. HRMS (ESI): *m/z* [M+H]<sup>+</sup> calcd for C<sub>18</sub>H<sub>17</sub>BrNO<sub>3</sub>: 374.0387; found: 374.0396.

### 5-(Dimethoxy(phenyl)methyl)-2-(4-nitrophenyl)oxazole (2e) :

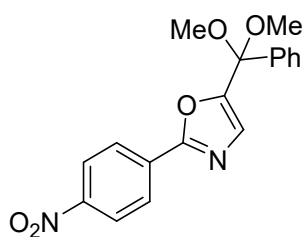

White solid, 50%, 34.1 mg, mp 88-89 °C; <sup>1</sup>H NMR (400 MHz, CDCl<sub>3</sub>) δ 8.25 (d, *J* = 8.7 Hz, 2H), 8.09 (d, *J* = 8.7 Hz, 2H), 7.58 (d, *J* = 7.2 Hz, 2H), 7.44 – 7.30 (m, 4H), 3.22 (s, 6H). <sup>13</sup>C NMR (100 MHz, CDCl<sub>3</sub>) δ 159.6, 152.7, 148.6, 138.3, 132.7, 128.8, 128.3, 128.1, 127.1×2, 124.0, 99.8, 49.6.

HRMS (ESI): *m/z* [M+H]<sup>+</sup> calcd for C<sub>18</sub>H<sub>17</sub>N<sub>2</sub>O<sub>5</sub>: 341.1132; found: 341.1141.

**5-(Dimethoxy(phenyl)methyl)-2-(3-methoxyphenyl)oxazole (2f) :**

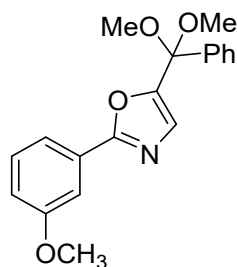

White solid, 48%, 31.2 mg, mp 74-76 °C; <sup>1</sup>H NMR (400 MHz, CDCl<sub>3</sub>) δ 7.58 (d, *J* = 8.1 Hz, 2H), 7.51 (d, *J* = 7.8 Hz, 1H), 7.47 (s, 1H), 7.39-7.26 (m, 5H), 6.95 (d, *J* = 8.2 Hz, 1H), 3.83 (s, 3H), 3.22 (s, 6H). <sup>13</sup>C NMR (100 MHz, CDCl<sub>3</sub>) δ 161.7, 159.8, 151.0, 138.6, 129.8, 128.6, 128.5, 128.2, 127.2, 127.1, 118.9, 116.9,

111.1, 99.9, 55.5, 49.6. HRMS (ESI): *m/z* [M+H]<sup>+</sup> calcd for C<sub>19</sub>H<sub>20</sub>NO<sub>4</sub>: 326.1387; found: 326.1395.

**5-(Dimethoxy(phenyl)methyl)-2-(3-(trifluoromethyl)phenyl)oxazole (2g) :**

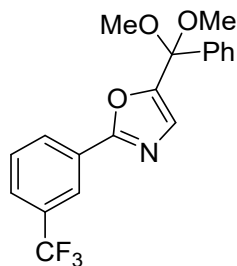

White solid, 65%, 47.2 mg, mp 77-79 °C; <sup>1</sup>H NMR (400 MHz, CDCl<sub>3</sub>) δ 8.19 (s, 1H), 8.11 (d, *J* = 7.8 Hz, 1H), 7.65 (d, *J* = 7.8 Hz, 1H), 7.58 (d, *J* = 7.2 Hz, 4H), 7.52 (t, *J* = 7.8 Hz, 1H), 7.43 – 7.28 (m, 4H), 3.22 (s, 6H). <sup>13</sup>C NMR (100 MHz, CDCl<sub>3</sub>) δ 160.4,

151.8, 138.5, 131.3(*q*, *J* = 33.0 Hz), 129.5, 129.3, 128.7, 128.3, 128.2, 127.5, 127.1, 126.8(*q*, *J* = 4.0 Hz), 123.7(*q*, *J* = 271.0 Hz), 123.3(*q*, *J* = 4.0 Hz), 99.8, 49.6. <sup>19</sup>F NMR (376 MHz, CDCl<sub>3</sub>) δ -62.9. HRMS (ESI): *m/z* [M+H]<sup>+</sup> calcd for C<sub>19</sub>H<sub>17</sub>F<sub>3</sub>NO<sub>3</sub>: 364.1155; found: 364.1161.

**5-(Dimethoxy(phenyl)methyl)-2-(2-fluorophenyl)oxazole (2h) :**

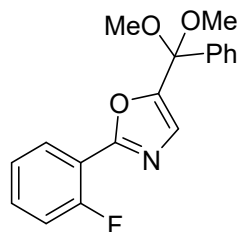

White solid, 89%, 55.7 mg, mp 81-83 °C; <sup>1</sup>H NMR (400 MHz, CDCl<sub>3</sub>) δ 7.86-7.85 (m, 1H), 7.59 (d, *J* = 7.3 Hz, 2H), 7.41 – 7.27

(m, 5H), 7.20 – 7.09 (m, 2H), 3.23 (s, 6H). <sup>13</sup>C NMR (100 MHz, CDCl<sub>3</sub>) δ 160.0 (d, *J* = 256.0 Hz), 158.0 (d, *J* = 5.0 Hz), 151.2, 138.5, 132.0, 131.9 (d, *J* = 9.0 Hz), 129.4, 128.6, 128.2, 127.3, 127.1, 124.2 (d, *J* = 3.0 Hz), 116.8 (d, *J* = 21.0 Hz), 99.8, 49.6. <sup>19</sup>F NMR (376 MHz, CDCl<sub>3</sub>) δ -111.7. HRMS (ESI): *m/z* [M+H]<sup>+</sup> calcd for C<sub>18</sub>H<sub>17</sub>FNO<sub>3</sub>: 314.1187; found: 314.1185.

**2-(2-Bromophenyl)-5-(dimethoxy(phenyl)methyl)oxazole (2i) :**

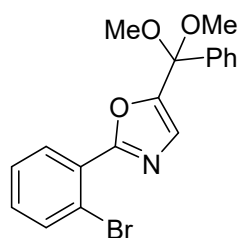

White solid, 84%, 62.7 mg, mp 75-76 °C; <sup>1</sup>H NMR (400 MHz, CDCl<sub>3</sub>) δ 7.78 (dd, *J* = 7.8, 1.6 Hz, 1H), 7.64 (d, *J* = 8.0 Hz, 1H), 7.61 – 7.56 (m, 2H), 7.40 – 7.28 (m, 5H), 7.25-7.23 (m, 1H), 3.24 (s, 6H). <sup>13</sup>C NMR (100 MHz, CDCl<sub>3</sub>) δ 160.1, 151.6, 138.5, 134.4, 131.2×2, 128.5, 128.2, 127.2, 127.1, 126.9, 121.1, 99.8, 49.7.

HRMS (ESI): *m/z* [M+H]<sup>+</sup> calcd for C<sub>18</sub>H<sub>17</sub>BrNO<sub>3</sub>: 374.0387; found: 374.0395.

**5-(Dimethoxy(phenyl)methyl)-2-(2-iodophenyl)oxazole (2j) :**

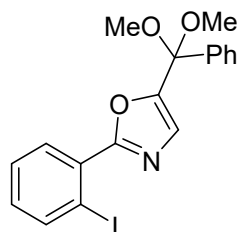

White solid, 86%, 72.4 mg, mp 93-95 °C; <sup>1</sup>H NMR (400 MHz, CDCl<sub>3</sub>) δ 7.94 (d, *J* = 7.9 Hz, 1H), 7.71 (d, *J* = 6.9 Hz, 1H), 7.60 (d, *J* = 7.4 Hz, 2H), 7.44 – 7.28 (m, 5H), 7.05 (t, *J* = 7.2 Hz, 1H), 3.24 (s, 6H). <sup>13</sup>C NMR (100 MHz, CDCl<sub>3</sub>) δ 160.9, 151.5, 141.2, 138.6, 132.0, 131.2, 131.0, 128.5, 128.2, 127.9, 127.2, 126.8, 99.9,

93.7, 49.7. HRMS (ESI): *m/z* [M+H]<sup>+</sup> calcd for C<sub>18</sub>H<sub>17</sub>INO<sub>3</sub>: 422.0248; found: 422.0251.

**5-(Dimethoxy(p-tolyl)methyl)-2-phenyloxazole (2k):**

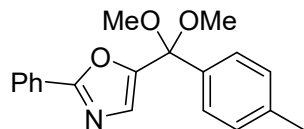

White solid, 91%, 56.2 mg, mp 62-63 °C; <sup>1</sup>H NMR (400 MHz, CDCl<sub>3</sub>) δ 7.96 – 7.90 (m, 2H), 7.46 (d, *J* = 7.9 Hz, 2H), 7.41 – 7.36 (m, 3H), 7.30 (s, 1H), 7.18 (d, *J* = 7.9 Hz, 2H),

3.21 (s, 6H), 2.35 (s, 2H). <sup>13</sup>C NMR (100 MHz, CDCl<sub>3</sub>) δ 161.7, 151.1, 138.3, 135.7, 130.3, 128.9, 128.6, 127.3, 127.1, 127.0, 126.4, 99.9, 49.5, 21.2. HRMS (ESI): *m/z* [M+H]<sup>+</sup> calcd for C<sub>19</sub>H<sub>20</sub>NO<sub>3</sub>: 310.1438; found: 310.1445.

**5-((4-(tert-Butyl)phenyl)dimethoxymethyl)-2-phenyloxazole (2l):**

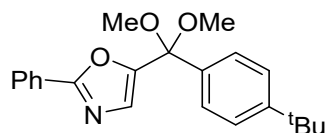

White solid, 63%, 44.2 mg, mp 94-95 °C; <sup>1</sup>H NMR (400 MHz, CDCl<sub>3</sub>) δ 7.98 – 7.93 (m, 2H), 7.50 – 7.45 (m, 2H),

7.42 – 7.34 (m, 5H), 7.29 (s, 1H), 3.21 (s, 6H), 1.31 (s, 9H). <sup>13</sup>C NMR (100 MHz, CDCl<sub>3</sub>) δ 161.7, 151.4, 151.2, 135.5, 130.3, 128.6, 127.4, 127.0, 126.7, 126.4, 125.1, 99.9, 49.6, 34.6, 31.3. HRMS (ESI): *m/z* [M+H]<sup>+</sup> calcd for C<sub>22</sub>H<sub>26</sub>NO<sub>3</sub>: 352.1907; found: 352.1899.

**5-(Dimethoxy(4-methoxyphenyl)methyl)-2-phenyloxazole (2m):**

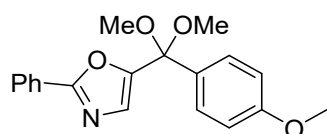

White solid, 93%, 60.5 mg, mp 73-74 °C; <sup>1</sup>H NMR (400 MHz, CDCl<sub>3</sub>) δ 7.94 (dd, *J* = 6.7, 3.0 Hz, 2H), 7.49 (d, *J* = 8.8 Hz, 2H), 7.44 – 7.36 (m, 3H), 7.28 (s, 1H), 6.89 (d, *J* = 8.9 Hz, 2H), 3.81 (s, 3H), 3.20 (s, 6H). <sup>13</sup>C NMR (100 MHz, CDCl<sub>3</sub>) δ 161.7, 159.7, 151.2, 130.8, 130.3, 128.7, 128.4, 127.3, 127.1, 126.4, 113.5, 99.8, 55.3, 49.5. HRMS (ESI): *m/z* [M+H]<sup>+</sup> calcd for C<sub>19</sub>H<sub>20</sub>NO<sub>4</sub>: 326.1387; found: 326.1396.

**5-((4-Fluorophenyl)dimethoxymethyl)-2-phenyloxazole (2n):**

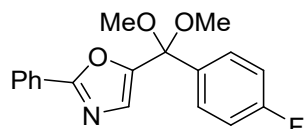

White solid, 67%, 41.9 mg, mp 79-80 °C; <sup>1</sup>H NMR (400 MHz, CDCl<sub>3</sub>) δ 7.96 – 7.90 (m, 2H), 7.56 (dd, *J* = 8.8, 5.4 Hz, 2H), 7.44 – 7.38 (m, 3H), 7.30 (s, 1H), 7.05 (t, *J* = 8.7 Hz, 2H), 3.20 (s, 6H). <sup>13</sup>C NMR (100 MHz, CDCl<sub>3</sub>) δ 163.0 (d, *J* = 218.0 Hz), 150.7, 134.6, 130.5, 129.1 (d, *J* = 9.0 Hz), 128.7, 127.3, 126.4, 115.2 (d, *J* = 22.0 Hz), 99.6, 49.6. <sup>19</sup>F NMR (376 MHz, CDCl<sub>3</sub>) δ -113.6. HRMS (ESI): *m/z* [M+H]<sup>+</sup> calcd for C<sub>18</sub>H<sub>17</sub>FNO<sub>3</sub>: 314.1187; found: 314.1196.

**5-((4-Chlorophenyl)dimethoxymethyl)-2-phenyloxazole (2o):**

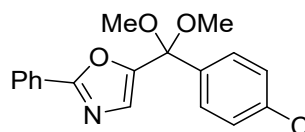

White solid, 51%, 33.6 mg, mp 99-101 °C; <sup>1</sup>H NMR (400 MHz, CDCl<sub>3</sub>) δ 7.93 (dd, *J* = 6.5, 3.0 Hz, 2H), 7.52 (d, *J* = 8.6 Hz, 2H), 7.43 – 7.37 (m, 3H), 7.34 (d, *J* = 8.5 Hz, 2H), 7.31 (s, 1H), 3.20 (s, 6H). <sup>13</sup>C NMR (100 MHz, CDCl<sub>3</sub>) δ 162.0, 150.4, 137.3, 134.5, 130.5, 128.7, 128.6, 128.5, 127.3, 127.2, 126.4, 99.5, 49.6. HRMS (ESI): *m/z* [M+H]<sup>+</sup> calcd for C<sub>18</sub>H<sub>17</sub>ClNO<sub>3</sub>: 330.0892; found: 330.0885.

**4-((2-(2-Bromophenyl)oxazol-5-yl)dimethoxymethyl)benzonitrile (2p) :**

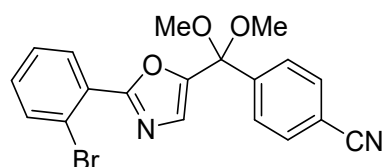

White solid, 71%, 56.5 mg, mp 77-79 °C; <sup>1</sup>H NMR (400 MHz, CDCl<sub>3</sub>) δ 7.78 (dd, *J* = 7.8, 1.4 Hz, 1H), 7.76 – 7.63 (m, 5H), 7.40 (s, 1H), 7.35 (t, *J* = 7.0 Hz,

1H), 7.29 – 7.25 (m, 1H), 3.24 (s, 6H). <sup>13</sup>C NMR (100 MHz, CDCl<sub>3</sub>) δ 160.6, 150.3, 143.8, 134.5, 132.2, 131.5, 131.3, 128.1, 128.0, 127.4, 121.1, 118.6, 112.6, 99.3, 49.9. HRMS (ESI): *m/z* [M+H]<sup>+</sup> calcd for C<sub>19</sub>H<sub>16</sub>BrN<sub>2</sub>O<sub>3</sub>: 399.0339; found: 399.0342.

**Ethyl 4-((2-(2-bromophenyl)oxazol-5-yl)dimethoxymethyl)benzoate (2q) :**

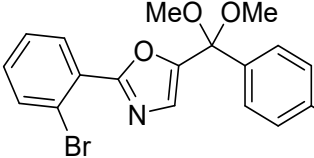  
White solid, 75%, 66.8 mg, mp 72-74 °C; <sup>1</sup>H NMR (400 MHz, CDCl<sub>3</sub>) δ 8.04 (d, *J* = 8.3 Hz, 2H), 7.77 (d, *J* = 7.6 Hz, 1H), 7.65 (dd, *J* = 13.5, 8.4 Hz, 3H), 7.39 (s, 1H), 7.33 (t, *J* = 7.2 Hz, 1H), 7.27 – 7.20 (m, 1H), 4.37 (q, *J* = 7.1 Hz, 2H), 3.24 (s, 6H), 1.38 (t, *J* = 7.1 Hz, 3H). <sup>13</sup>C NMR (100 MHz, CDCl<sub>3</sub>) δ 166.3, 160.3, 150.9, 143.3, 134.4, 131.3, 131.2, 130.7, 129.5, 128.1, 127.3, 127.2, 127.1, 121.1, 99.6, 61.0, 49.8, 14.3. HRMS (ESI): *m/z* [M+H]<sup>+</sup> calcd for C<sub>21</sub>H<sub>21</sub>BrNO<sub>5</sub>: 446.0598; found: 446.0601.

**5-(Dimethoxy(3-methoxyphenyl)methyl)-2-phenyloxazole (2r):**

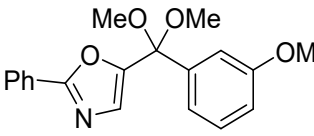  
White solid, 83%, 54.1 mg, mp 75-76 °C; <sup>1</sup>H NMR (400 MHz, CDCl<sub>3</sub>) δ 7.94 (dd, *J* = 6.1, 2.4 Hz, 2H), 7.44 – 7.35 (m, 3H), 7.29 (d, *J* = 9.3 Hz, 2H), 7.15 (d, *J* = 7.1 Hz, 2H), 6.86 (d, *J* = 9.1 Hz, 1H), 3.82 (s, 3H), 3.22 (s, 6H). <sup>13</sup>C NMR (100 MHz, CDCl<sub>3</sub>) δ 161.8, 159.6, 150.9, 140.2, 130.4, 129.2, 128.6, 127.3, 127.2, 126.4, 119.5, 114.1, 112.6, 99.7, 55.3, 49.6. HRMS (ESI): *m/z* [M+H]<sup>+</sup> calcd for C<sub>19</sub>H<sub>20</sub>NO<sub>4</sub>: 326.1387; found: 326.1401.

**2-(2-Bromophenyl)-5-((3-chlorophenyl)dimethoxymethyl)oxazole (2s) :**

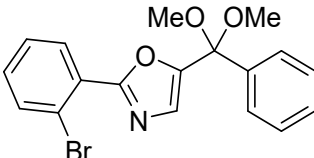  
White solid, 79%, 64.3 mg, mp 78-80 °C; <sup>1</sup>H NMR (400 MHz, CDCl<sub>3</sub>) δ 7.80 (dd, *J* = 7.8, 1.5 Hz, 1H), 7.68 – 7.61 (m, 2H), 7.48 – 7.41 (m, 1H), 7.39 – 7.32 (m, 2H), 7.31 – 7.24 (m, 3H), 3.24 (s, 6H). <sup>13</sup>C NMR (100 MHz, CDCl<sub>3</sub>) δ 160.3, 150.9, 140.8, 134.5, 134.3, 131.3, 129.6, 128.8, 128.1, 127.5, 127.3, 127.1, 125.4, 121.1, 99.4, 49.8. HRMS (ESI): *m/z* [M+H]<sup>+</sup> calcd for C<sub>18</sub>H<sub>16</sub>BrClNO<sub>3</sub>: 407.9997; found: 407.9989.

**5-((3-Chlorophenyl)dimethoxymethyl)-2-(2-iodophenyl)oxazole (2t) :**

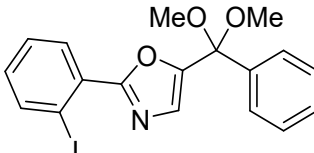  
White solid, 76%, 69.2 mg, mp 75-77 °C; <sup>1</sup>H NMR (400 MHz, CDCl<sub>3</sub>) δ 8.00 – 7.92 (m, 1H), 7.73 (dd, *J* = 7.8,



1.4 Hz, 1H), 7.64 (s, 1H), 7.50 – 7.42 (m, 1H), 7.39-7.36(m, 2H), 7.29-7.28 (m, 2H), 7.07 (td,  $J = 7.8, 1.5$  Hz, 1H), 3.24 (s, 6H).  $^{13}\text{C}$  NMR (100 MHz,  $\text{CDCl}_3$ )  $\delta$  161.2, 150.9, 141.2, 140.8, 134.3, 131.9, 131.3, 131.0, 129.6, 128.8, 128.0, 127.6, 127.0, 125.5, 99.4, 93.6, 49.8. HRMS (ESI):  $m/z$   $[\text{M}+\text{H}]^+$  calcd for  $\text{C}_{18}\text{H}_{16}\text{ClNO}_3$ : 455.9858; found: 455.9856.

**5-((2-Bromophenyl)dimethoxymethyl)-2-phenyloxazole (2u):**

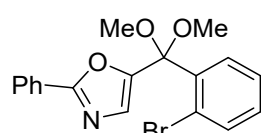

White solid, 49%, 36.6 mg, mp 101-102 °C;  $^1\text{H}$  NMR (400 MHz,  $\text{CDCl}_3$ )  $\delta$  8.12 (d,  $J = 8.0$  Hz, 1H), 7.92 (dd,  $J = 6.2, 2.3$  Hz, 2H), 7.56 (d,  $J = 7.9$  Hz, 1H), 7.45 – 7.36 (m, 4H), 7.34 (s, 1H), 7.21 (t,  $J = 7.6$  Hz, 1H), 3.20 (s, 6H).  $^{13}\text{C}$  NMR (100 MHz,  $\text{CDCl}_3$ )  $\delta$  161.3, 148.5, 136.5, 134.9, 130.6, 130.3, 130.2, 129.3, 128.6, 127.3, 127.1, 126.4, 121.6, 98.8, 49.3. HRMS (ESI):  $m/z$   $[\text{M}+\text{H}]^+$  calcd for  $\text{C}_{18}\text{H}_{17}\text{BrNO}_3$ : 374.0387; found: 374.0399.

**5-((2-Bromo-4-methylphenyl)dimethoxymethyl)-2-phenyloxazole (2v):**

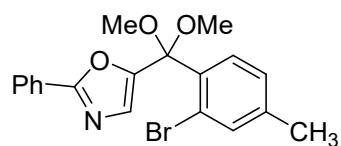

White solid, 82%, 63.5 mg, mp 76-78 °C;  $^1\text{H}$  NMR (400 MHz,  $\text{CDCl}_3$ )  $\delta$  7.97 (d,  $J = 8.1$  Hz, 1H), 7.93 (dd,  $J = 6.5, 2.9$  Hz, 2H), 7.39-7.37 (m, 4H), 7.33 (s, 1H), 7.21 (d,  $J = 8.1$  Hz, 1H), 3.19 (s, 6H), 2.33 (s, 3H).  $^{13}\text{C}$  NMR (100 MHz,  $\text{CDCl}_3$ )  $\delta$  161.2, 148.7, 140.5, 135.3, 133.5, 130.4, 130.3, 129.1, 128.6, 127.9, 127.4, 126.4, 121.3, 98.8, 49.2, 20.6. HRMS (ESI):  $m/z$   $[\text{M}+\text{H}]^+$  calcd for  $\text{C}_{19}\text{H}_{19}\text{BrNO}_3$ : 388.0543; found: 388.0551.

**5-((2-Bromo-4-chlorophenyl)dimethoxymethyl)-2-phenyloxazole(2w) :**

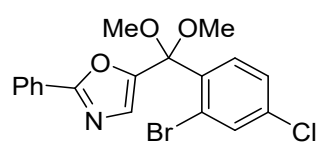

White solid, 47%, 38.3 mg, mp 91-92 °C;  $^1\text{H}$  NMR (400 MHz,  $\text{CDCl}_3$ )  $\delta$  8.06 (d,  $J = 8.6$  Hz, 1H), 7.94 – 7.89 (m, 2H), 7.57 (s, 1H), 7.43 – 7.37 (m, 4H), 7.35 (s, 1H), 3.18 (s, 6H).  $^{13}\text{C}$  NMR (100 MHz,  $\text{CDCl}_3$ )  $\delta$  161.4, 147.9, 135.4, 135.2, 134.3, 131.6, 130.4, 129.4, 128.7, 127.4, 127.2, 126.4, 122.0, 98.6, 49.3. HRMS (ESI):  $m/z$   $[\text{M}+\text{H}]^+$  calcd for  $\text{C}_{18}\text{H}_{16}\text{BrClNO}_3$ : 407.9997; found: 407.9999.

**5-((2,4-Dimethylphenyl)dimethoxymethyl)-2-phenyloxazole(2x):**

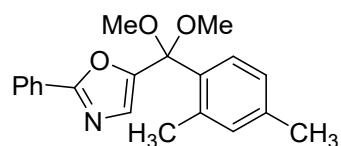

White solid, 94%, 60.7 mg, mp 82-84 °C;  $^1\text{H}$  NMR (400 MHz,  $\text{CDCl}_3$ )  $\delta$  7.92 (dd,  $J = 6.6, 2.9$  Hz, 2H), 7.83 (d,  $J = 8.0$  Hz, 1H), 7.42 – 7.36 (m, 3H), 7.27 (s, 1H), 7.09 (d,  $J =$

8.0 Hz, 1H), 6.92 (s, 1H), 3.17 (s, 6H), 2.32 (s, 3H), 2.21 (s, 3H). <sup>13</sup>C NMR (100 MHz, CDCl<sub>3</sub>) δ 161.4, 150.1, 138.4, 136.4, 133.1, 132.6, 130.3, 128.6, 128.4, 127.8, 127.4, 126.4, 99.3, 48.9, 20.9, 20.0 HRMS (ESI): *m/z* [M+H]<sup>+</sup> calcd for C<sub>20</sub>H<sub>22</sub>NO<sub>3</sub>: 324.1594; found: 324.1590.

**5-(Dimethoxy(naphthalen-1-yl)methyl)-2-phenyloxazole (2y):**

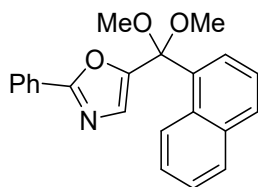

White solid, 83%, 57.3 mg, mp 102-103 °C; <sup>1</sup>H NMR (400 MHz, CDCl<sub>3</sub>) δ 8.52 – 8.47 (m, 1H), 8.24 (d, *J* = 7.3 Hz, 1H), 7.91 – 7.80 (m, 4H), 7.56 (t, *J* = 7.8 Hz, 1H), 7.45 – 7.37 (m, 3H), 7.36 – 7.31 (m, 3H), 3.24 (s, 6H). <sup>13</sup>C NMR (100 MHz, CDCl<sub>3</sub>) δ 161.4, 150.6, 134.0, 133.1, 130.3, 130.2, 128.7, 128.6, 127.8, 127.2, 127.0, 126.3, 125.4, 124.9, 124.8, 99.3, 49.3. HRMS (ESI): *m/z* [M+H]<sup>+</sup> calcd for C<sub>22</sub>H<sub>20</sub>NO<sub>3</sub>: 346.1438; found: 346.1440.

**5-(dimethoxy(thiophen-2-yl)methyl)-2-phenyloxazole(2z):**

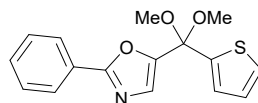

White solid, 68%, 40.9 mg, mp 86-87 °C; <sup>1</sup>H NMR (400 MHz, CDCl<sub>3</sub>) δ 7.98 (d, *J* = 3.5 Hz, 2H), 7.42-7.41 (m, 3H), 7.33-7.31 (m, 2H), 7.07 (d, *J* = 1.7 Hz, 1H), 7.03 – 6.96 (m, 1H), 3.27 (s, 6H). <sup>13</sup>C NMR (101 MHz, CDCl<sub>3</sub>) δ 161.9, 150.4, 142.5, 130.5, 128.7, 127.3, 127.2, 126.8, 126.5, 126.4, 98.7, 49.8. HRMS (ESI): *m/z* [M+H]<sup>+</sup> calcd for C<sub>16</sub>H<sub>16</sub>NO<sub>3</sub>S: 302.0845; found: 302.0844.

**5-(dimethoxy(phenyl)methyl)-2-(pyridin-4-yl)oxazole (2aa):**

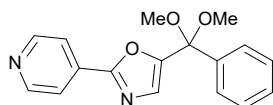

White solid, 73%, 43.2 mg, mp 65-67 °C; <sup>1</sup>H NMR (400 MHz, DMSO) δ 8.70 (d, *J* = 5.8 Hz, 2H), 7.74 (d, *J* = 5.8 Hz, 2H), 7.54-7.52 (m, 3H), 7.46 – 7.36 (m, 3H), 3.15 (s, 6H). <sup>13</sup>C NMR (101 MHz, DMSO) δ

159.2, 152.6, 151.2, 138.5, 133.6, 129.3, 128.9, 128.1, 127.1, 120.0, 99.8, 49.8. HRMS

(ESI):  $m/z$   $[M+H]^+$  calcd for  $C_{17}H_{17}N_2O_3$ : 297.1234; found: 297.1236.

**5-(Diethoxy(phenyl)methyl)-2-(2-iodophenyl)oxazole(2ab) :**

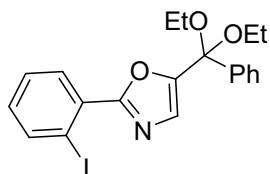

White solid, 75%, 67.4 mg, mp 95-96 °C;  $^1H$  NMR (400 MHz,  $CDCl_3$ )  $\delta$  7.94 (d,  $J = 7.9$  Hz, 1H), 7.71 (dd,  $J = 7.8, 1.3$  Hz, 1H), 7.62 (d,  $J = 7.3$  Hz, 2H), 7.33-7.29 (m, 5H), 7.05 (td,  $J = 7.7, 1.4$  Hz, 1H), 3.49-3.43 (m, 4H), 1.24 (t,  $J = 7.0$  Hz, 6H).  $^{13}C$

NMR (100 MHz,  $CDCl_3$ )  $\delta$  160.8, 152.5, 141.2, 139.6, 132.2, 131.1, 131.0, 128.3, 128.1, 127.9, 127.2, 126.3, 99.2, 93.6, 57.7, 15.1. HRMS (ESI):  $m/z$   $[M+H]^+$  calcd for  $C_{20}H_{21}INO_3$ : 450.0561; found: 450.0566.

**2-phenyl-5-(phenyldipropoxymethyl)oxazole (2ac):**

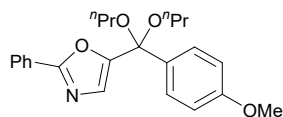

Yellow oil, 35%, 26.7 mg;  $^1H$  NMR (400 MHz, DMSO)  $\delta$  7.82-7.79 (m, 2H), 7.50 – 7.45 (m, 3H), 7.43 (d,  $J = 8.7$  Hz, 2H),

7.34 (s, 1H), 6.94 (d,  $J = 8.7$  Hz, 2H), 3.74 (s, 3H), 3.28-3.22 (m, 4H), 1.58-1.52 (m, 4H), 0.90 (t,  $J = 7.3$  Hz, 6H).  $^{13}C$  NMR (101 MHz, DMSO)  $\delta$  160.9, 159.7, 152.2, 131.6, 131.2, 129.6, 128.4, 127.1, 126.8, 126.2, 114.0, 98.9, 63.4, 55.5, 22.8, 11.2.

HRMS (ESI):  $m/z$   $[M+H]^+$  calcd for  $C_{23}H_{28}NO_4$ : 382.2013; found: 382.2020.

### (C) Spectra (NMR Spectra)

#### 5-(Dimethoxy(phenyl)methyl)-2-phenyloxazole (2a):

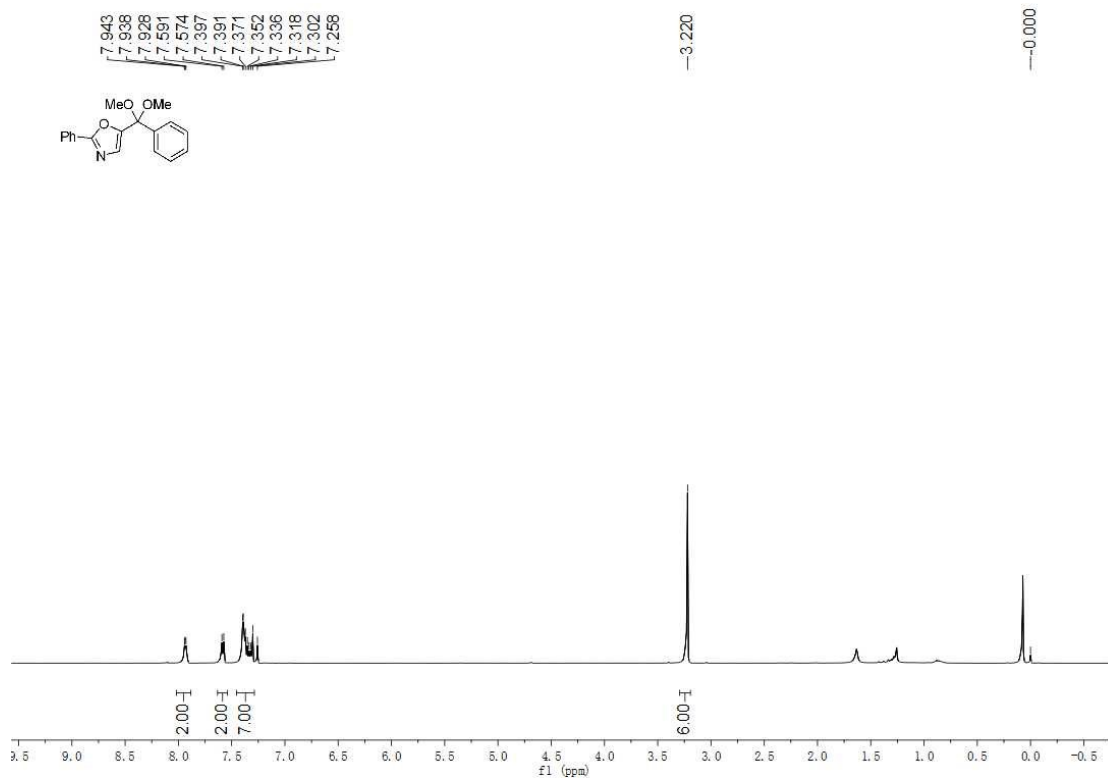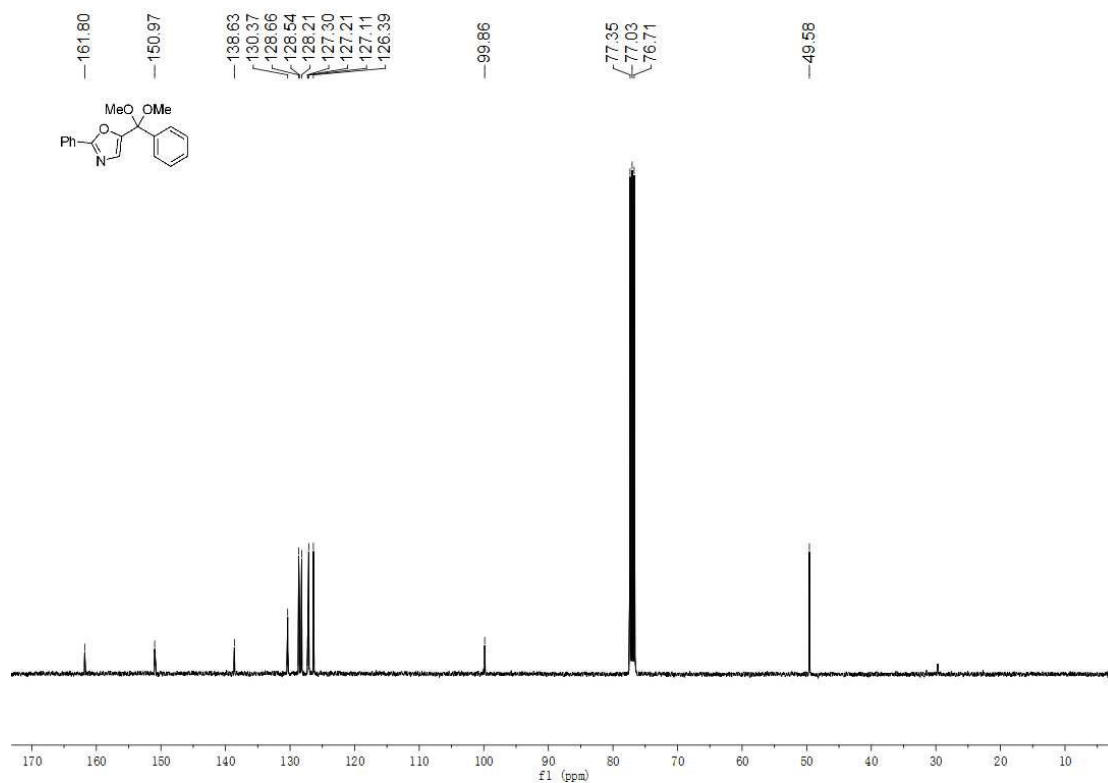

**<sup>13</sup>C NMR (100 MHz, CDCl<sub>3</sub>)**

### 5-(Dimethoxy(phenyl)methyl)-2-(*p*-tolyl)oxazole (2b):

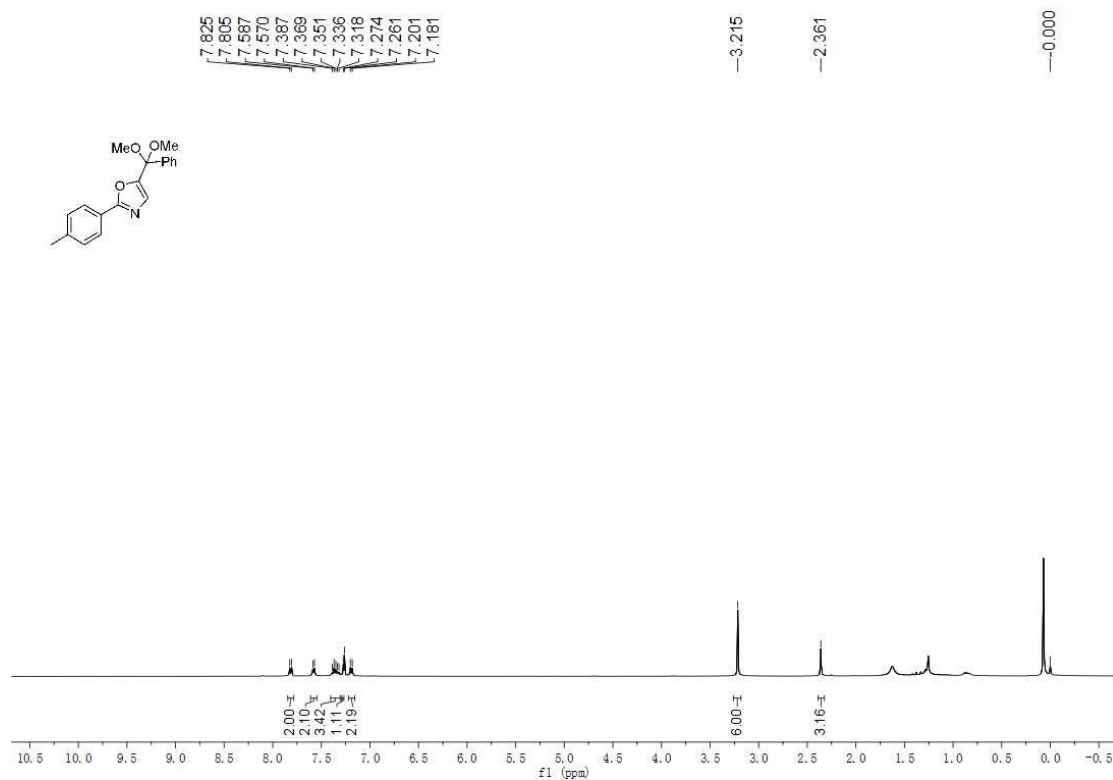

<sup>1</sup>H NMR (400 MHz, CDCl<sub>3</sub>)

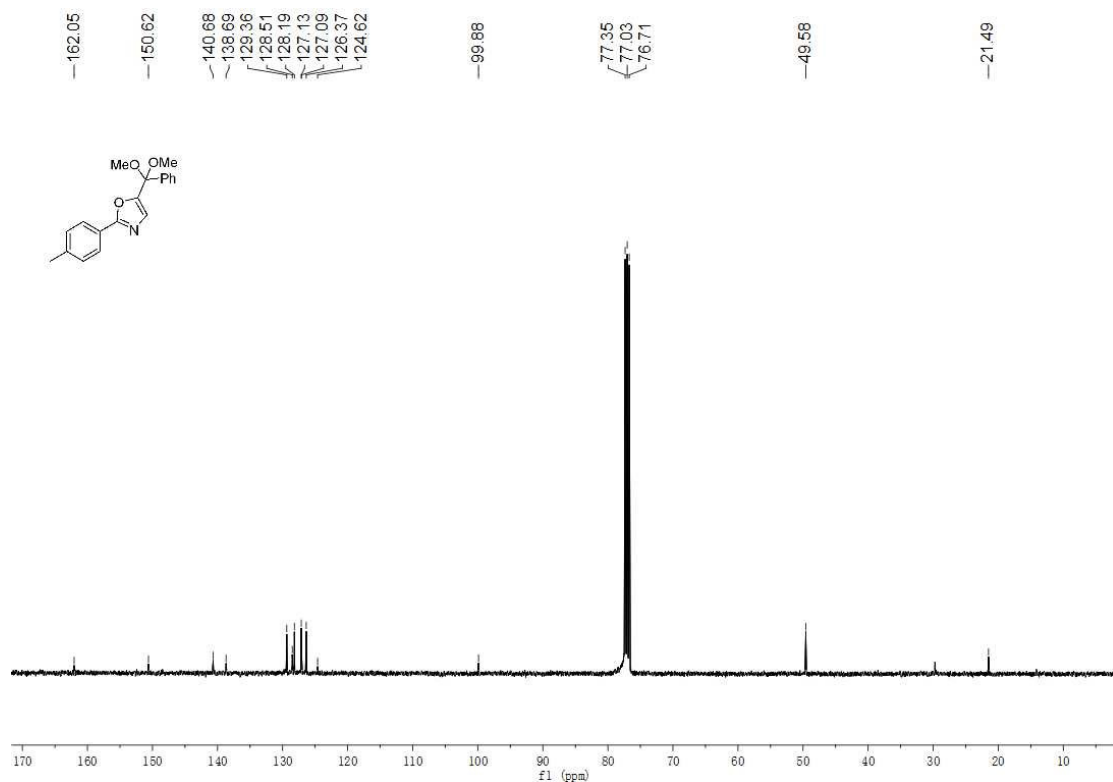

<sup>13</sup>C NMR (100 MHz, CDCl<sub>3</sub>)

**2-(4-Chlorophenyl)-5-(dimethoxy(phenyl)methyl)oxazole (2c):**

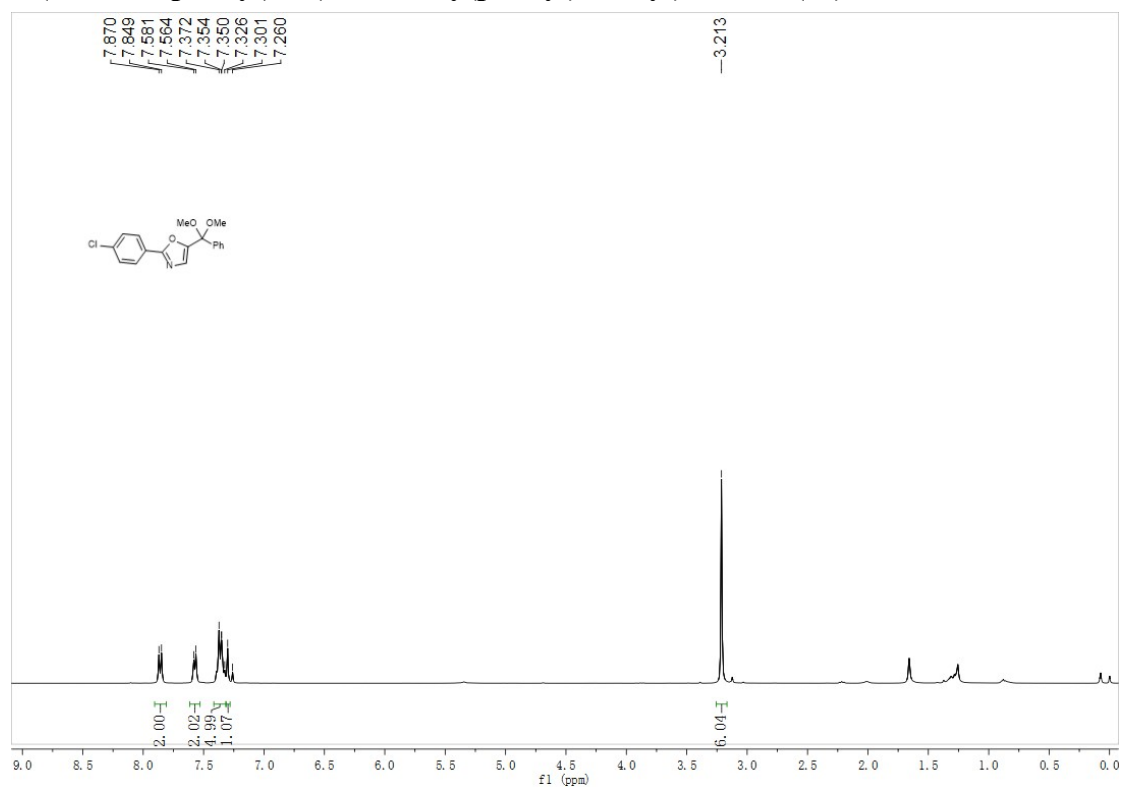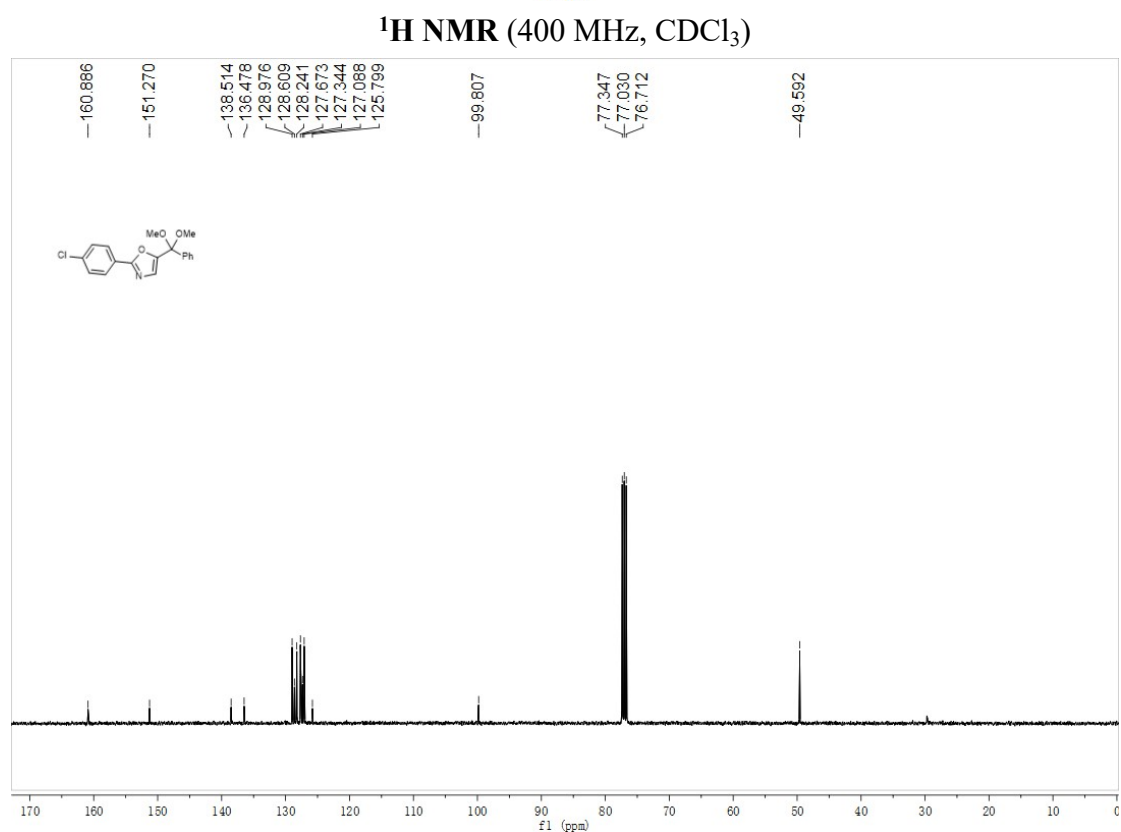

### 2-(4-Bromophenyl)-5-(dimethoxy(phenyl)methyl)oxazole (2d):

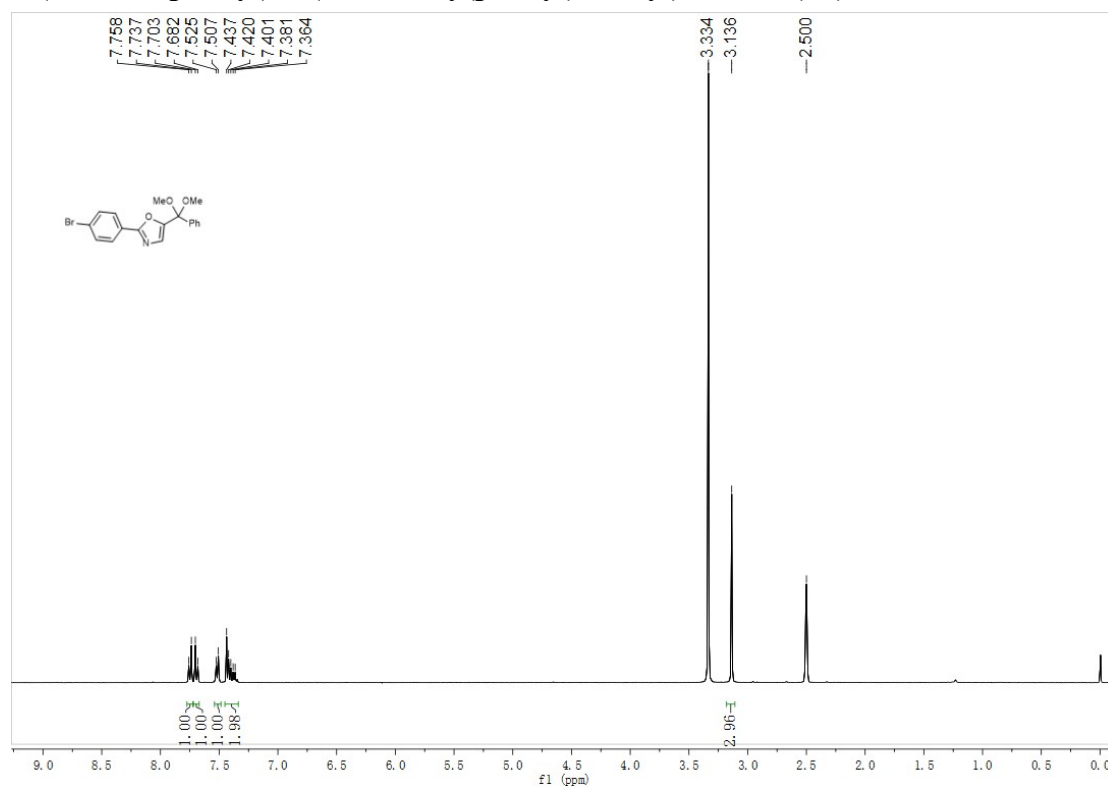

<sup>1</sup>H NMR (400 MHz, DMSO-*d*<sub>6</sub>)

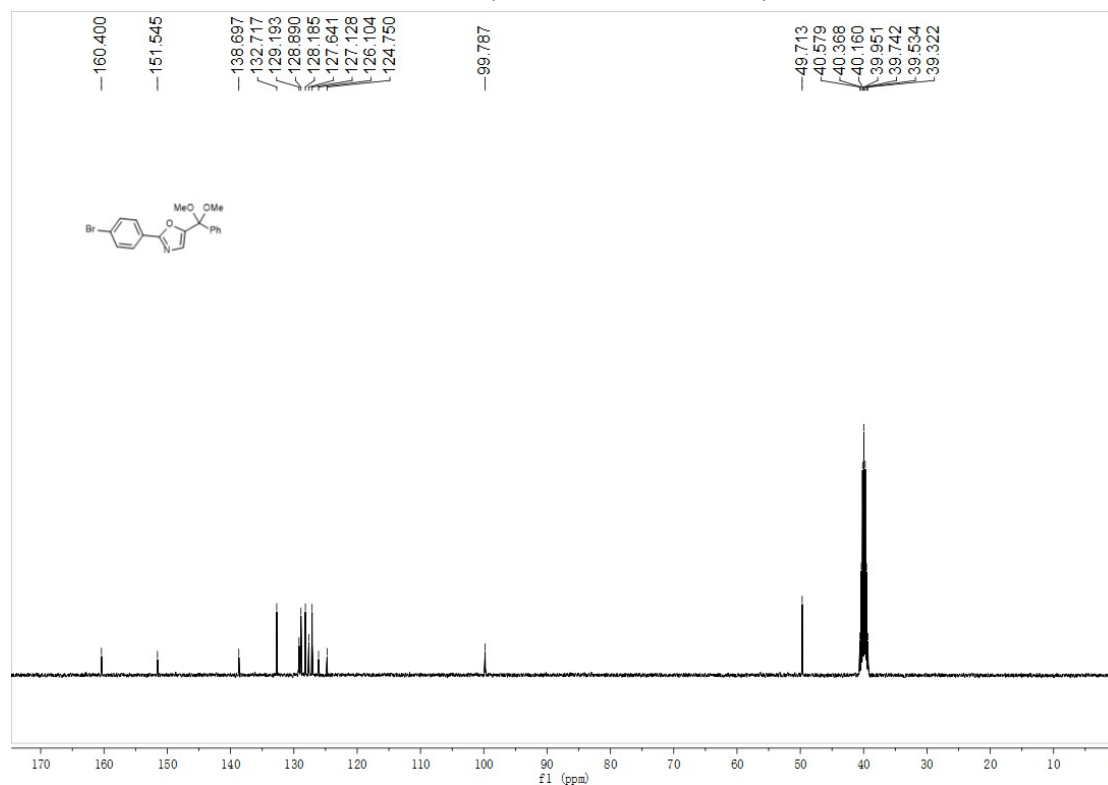

<sup>13</sup>C NMR (100 MHz, DMSO-*d*<sub>6</sub>)

### 5-(Dimethoxy(phenyl)methyl)-2-(4-nitrophenyl)oxazole (2e):

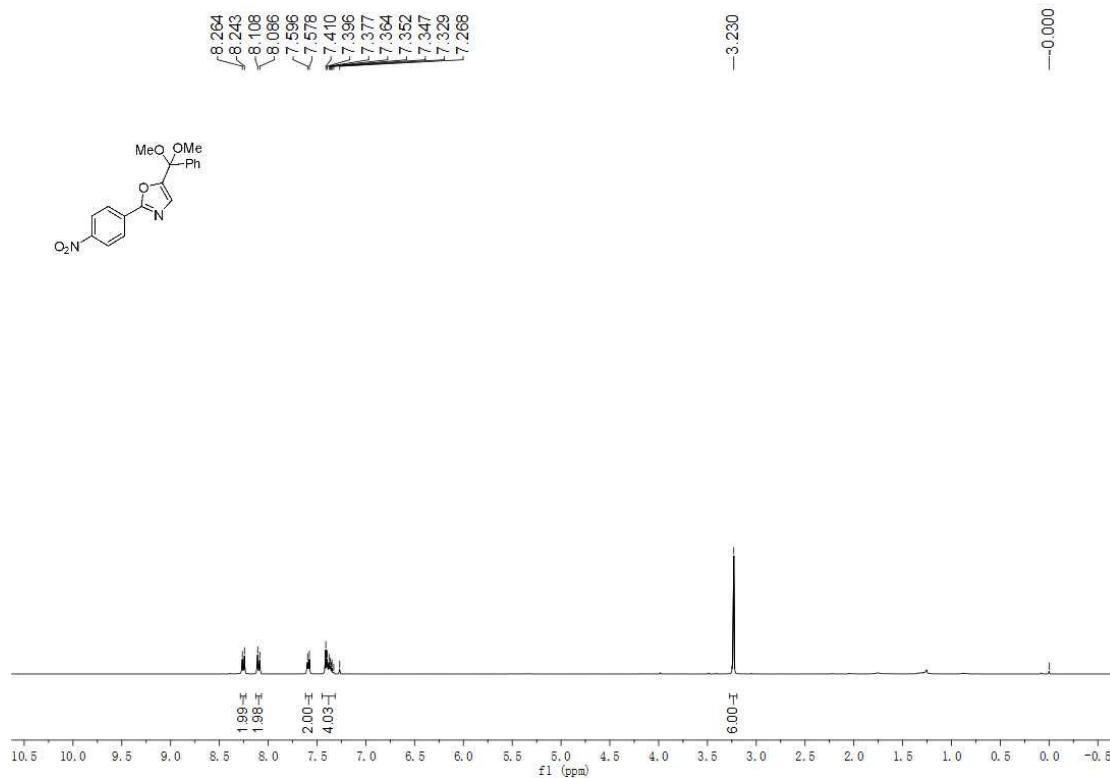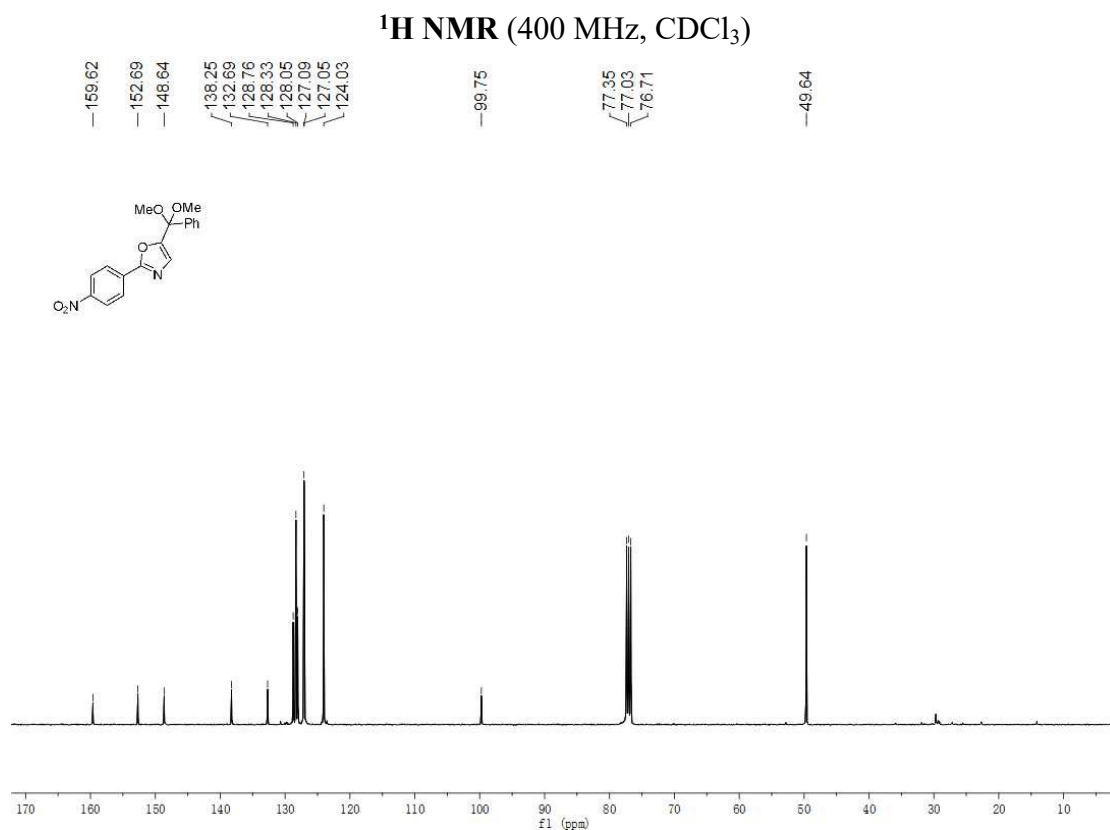



### 5-(Dimethoxy(phenyl)methyl)-2-(3-methoxyphenyl)oxazole (2f):

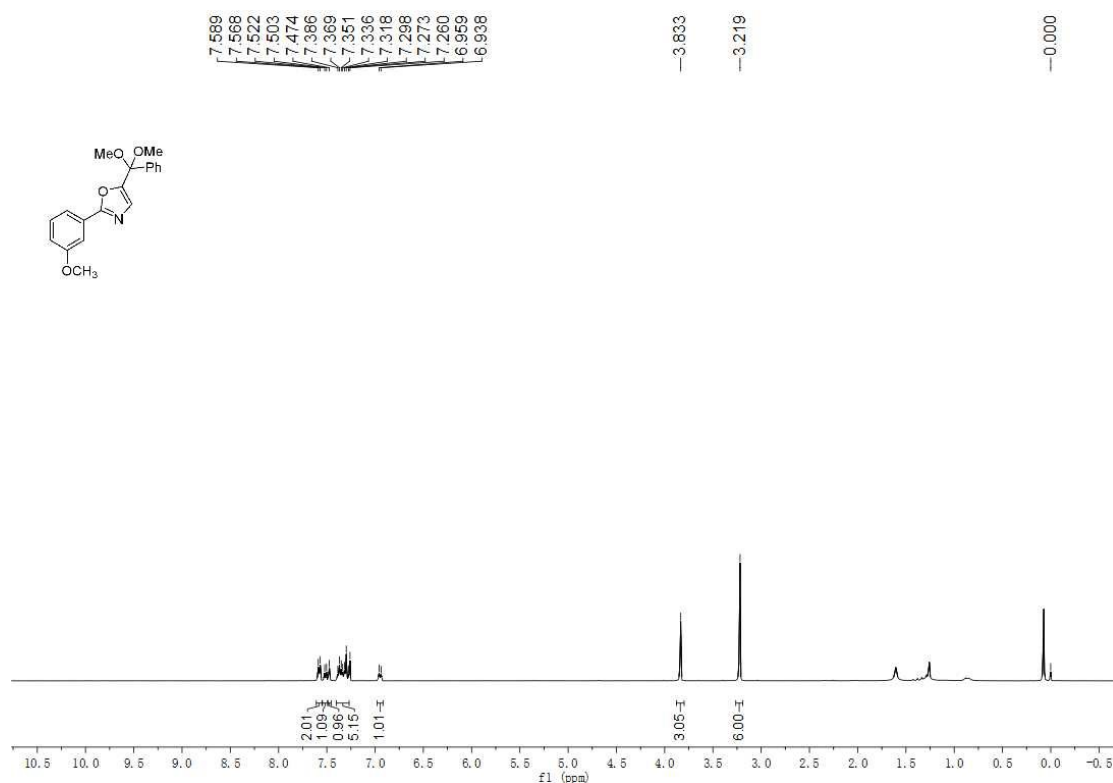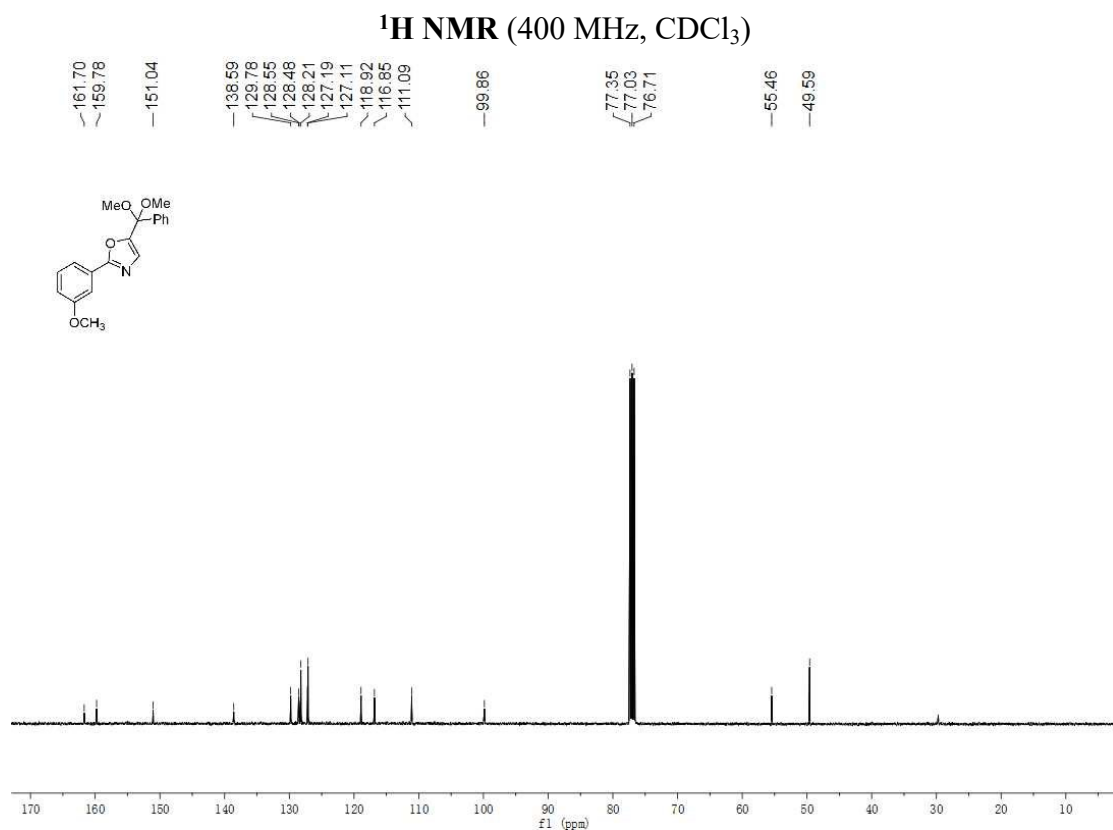

### 5-(Dimethoxy(phenyl)methyl)-2-(3-(trifluoromethyl)phenyl)oxazole (2g):

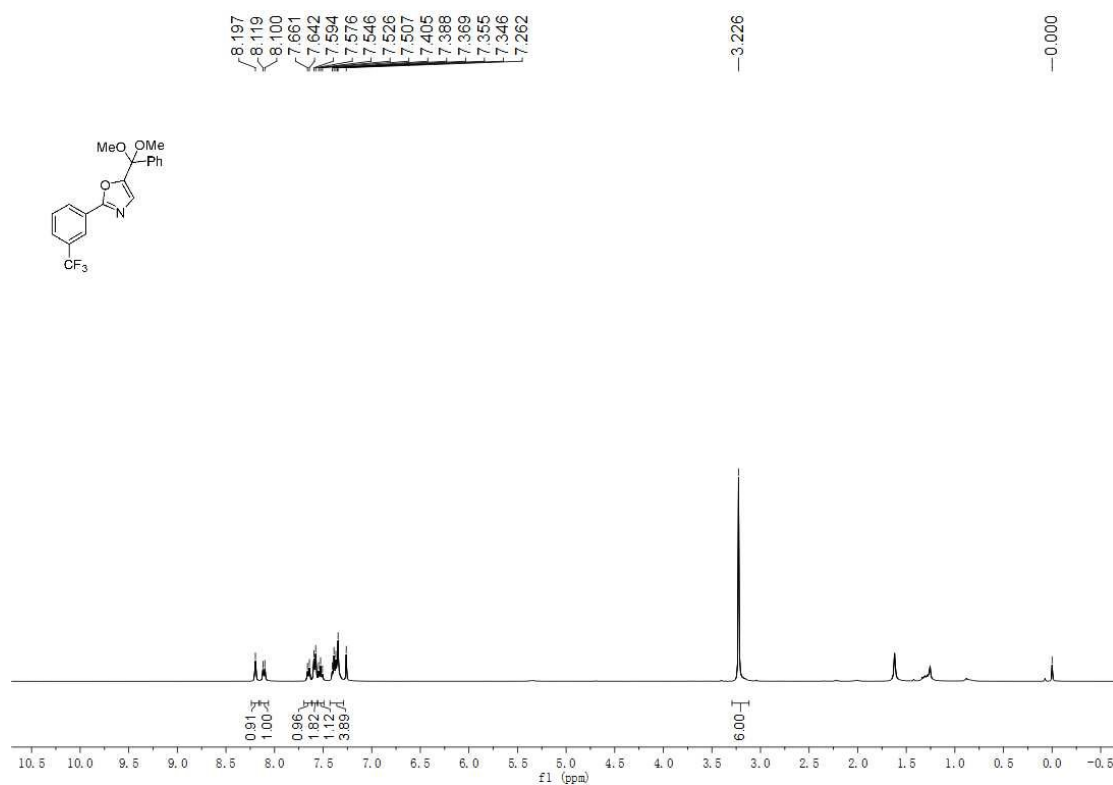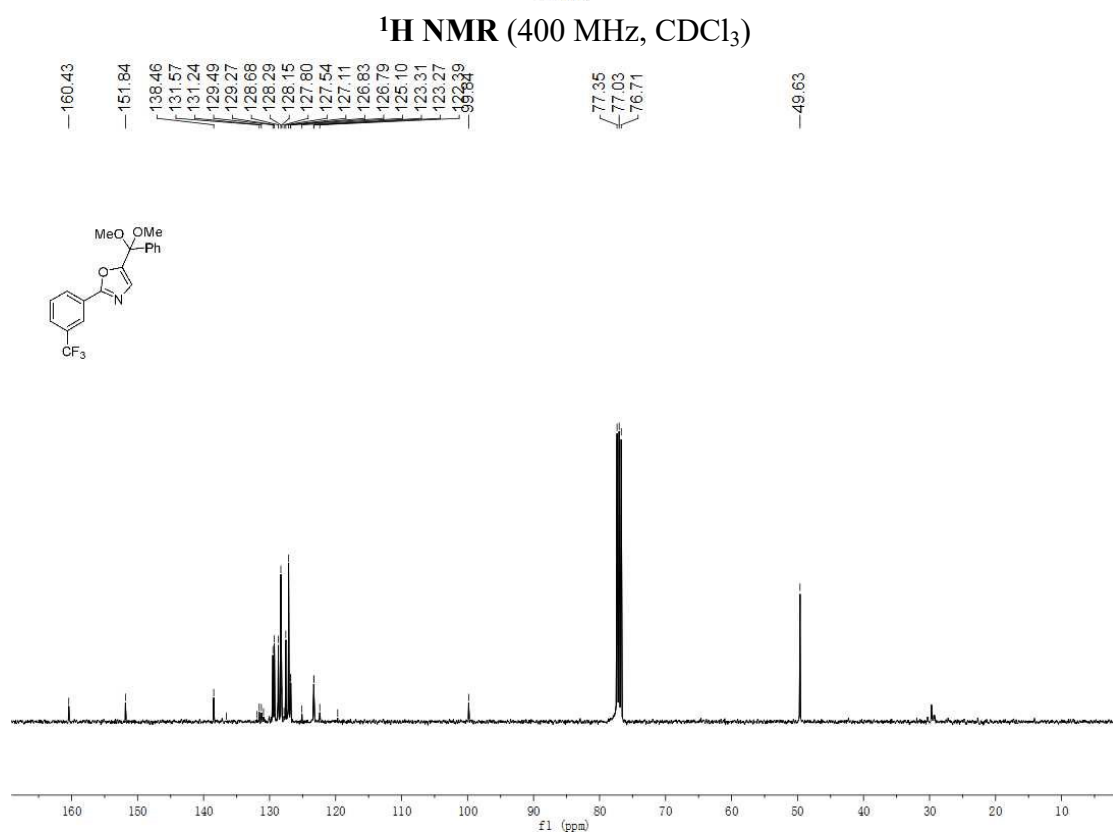

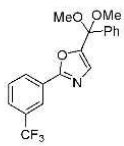

-62.86

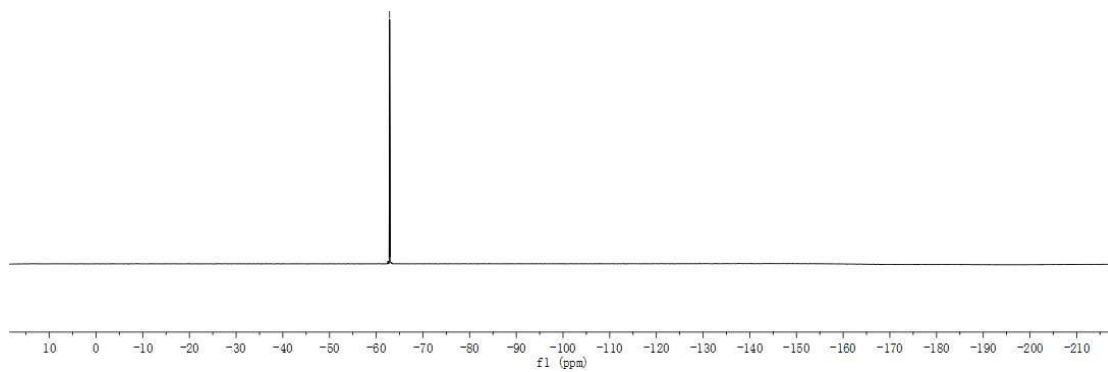

$^{19}\text{F}$  NMR (376 MHz,  $\text{CDCl}_3$ )

### 5-(Dimethoxy(phenyl)methyl)-2-(2-fluorophenyl)oxazole (2h):

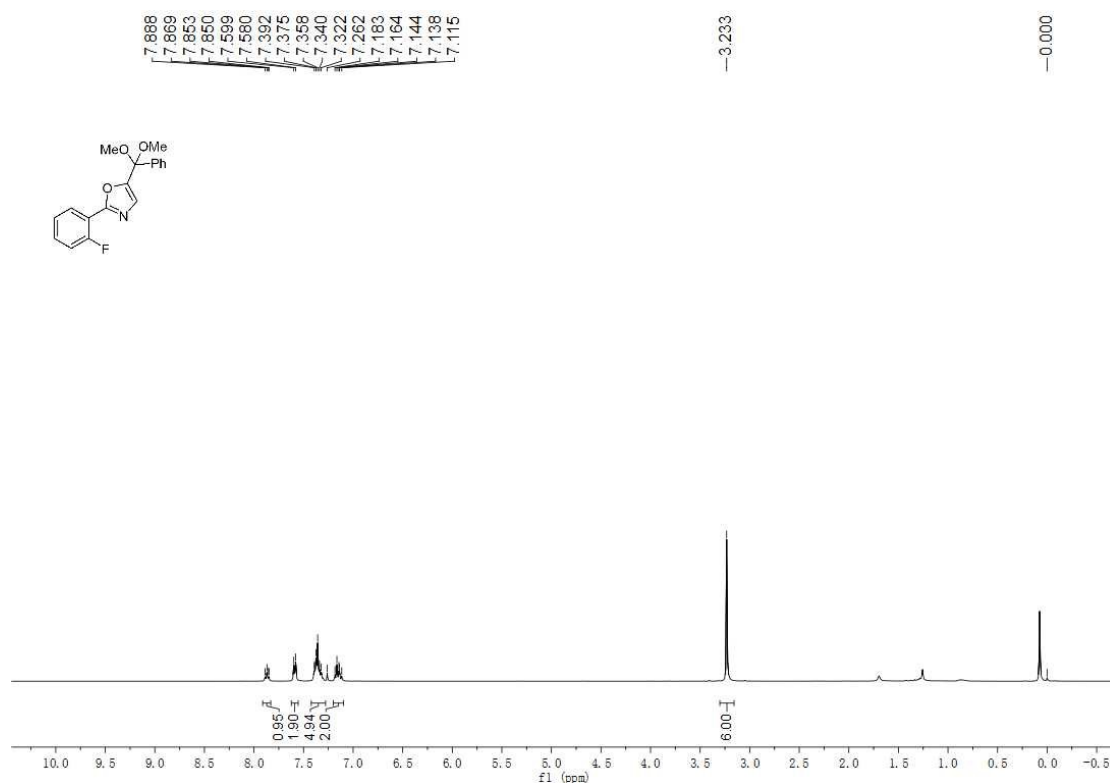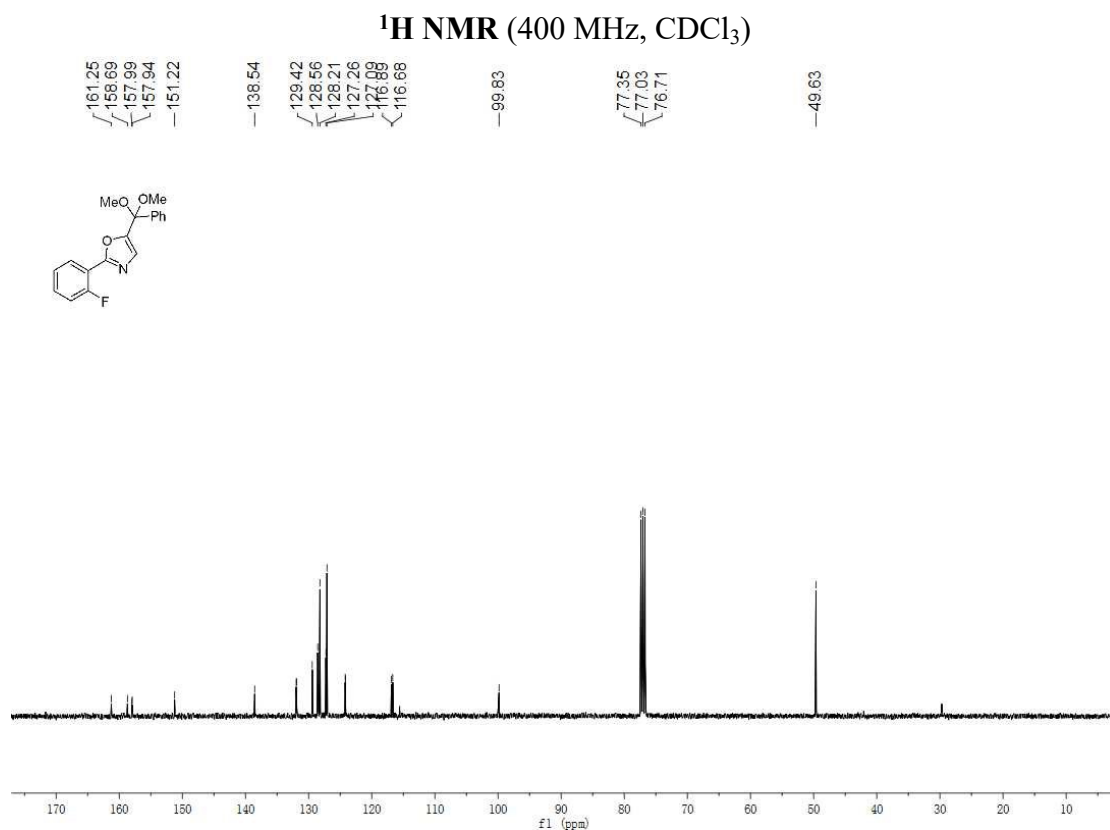

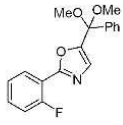

-111.71

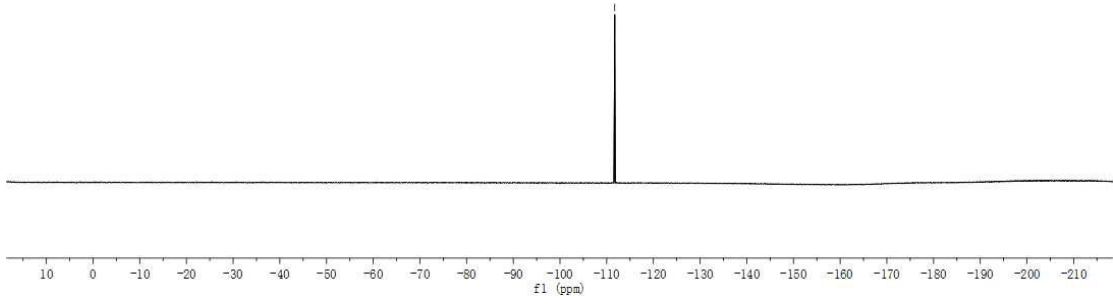

$^{19}\text{F}$  NMR (376 MHz,  $\text{CDCl}_3$ )

## 2-(2-Bromophenyl)-5-(dimethoxy(phenyl)methyl)oxazole (2i):

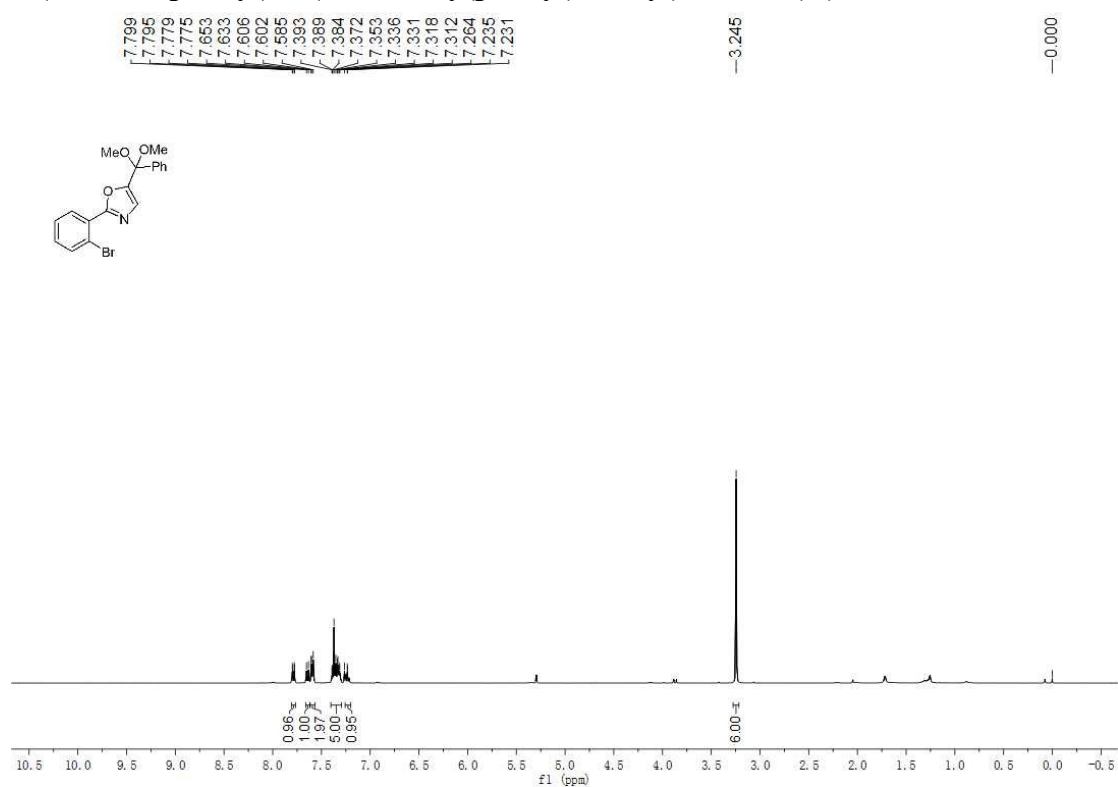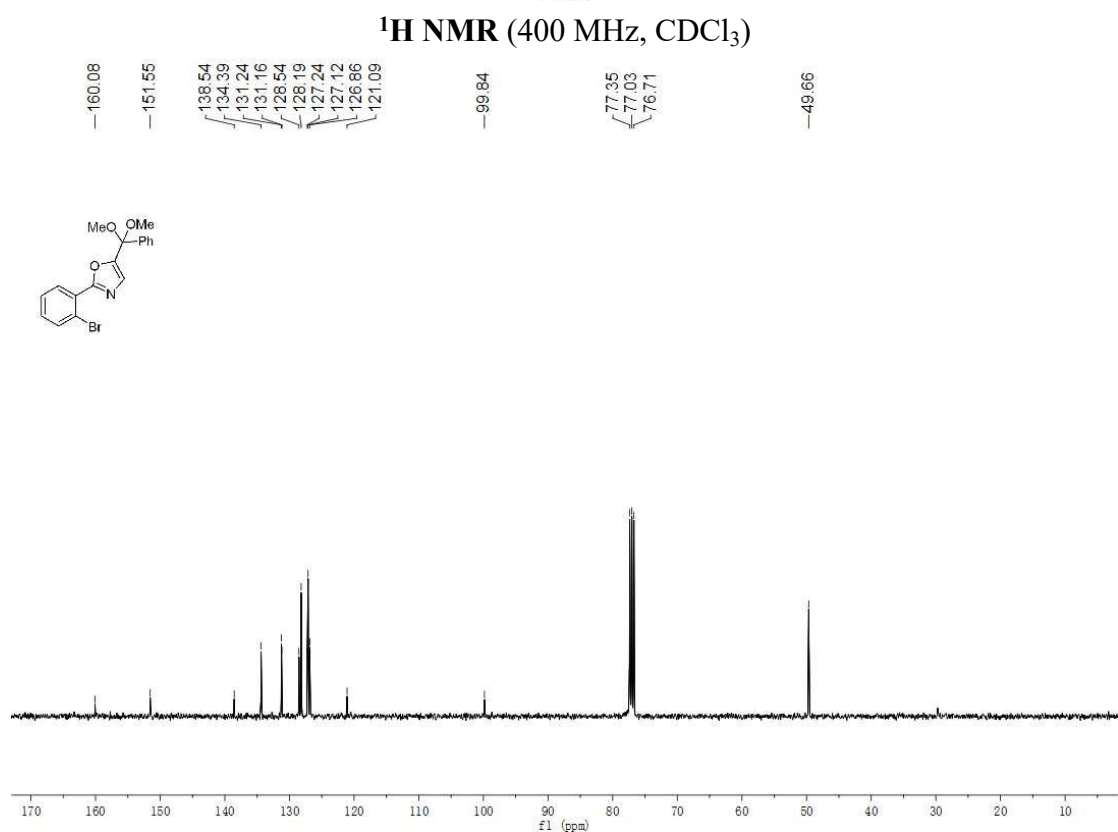

### 5-(Dimethoxy(phenyl)methyl)-2-(2-iodophenyl)oxazole (2j):

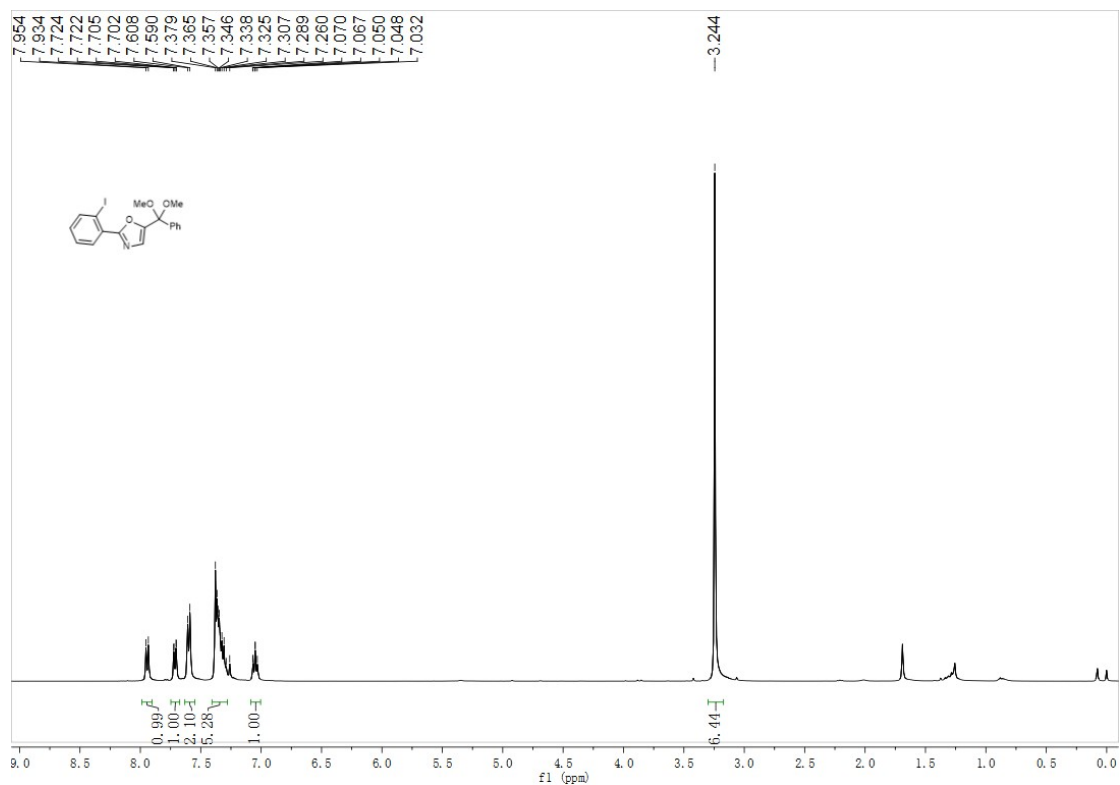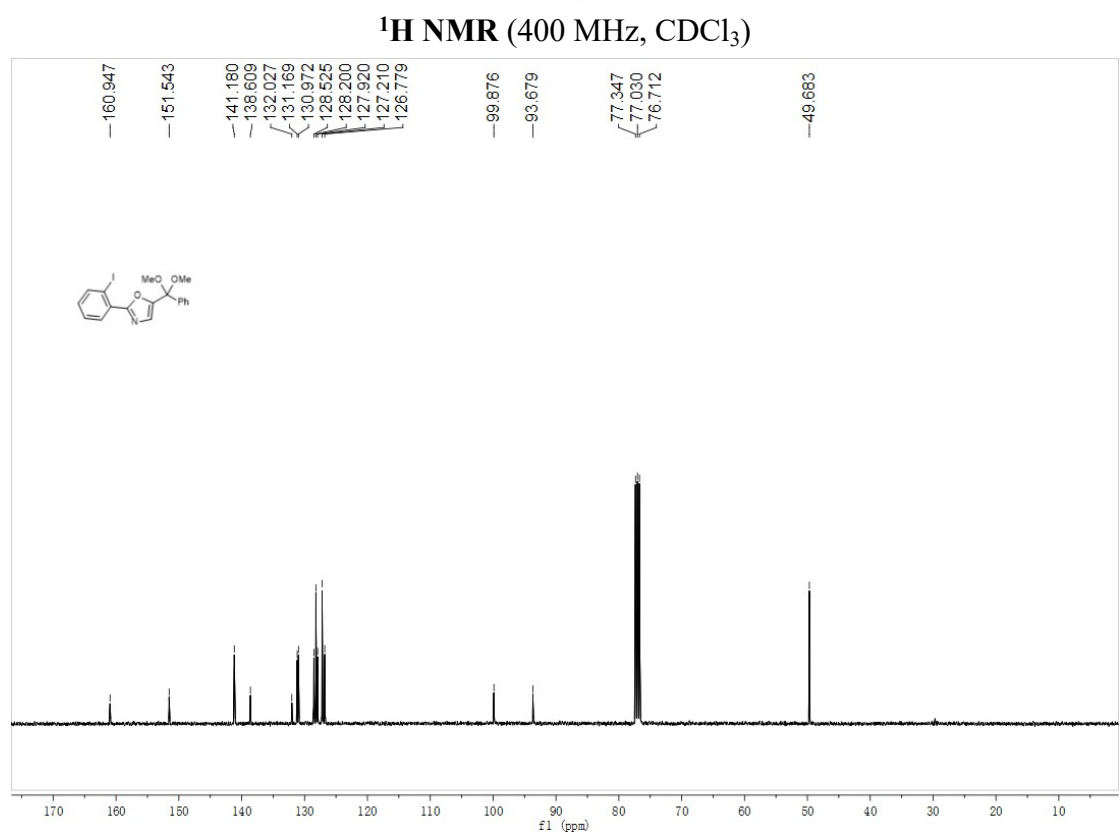

### 5-(Dimethoxy(p-tolyl)methyl)-2-phenyloxazole (2k):

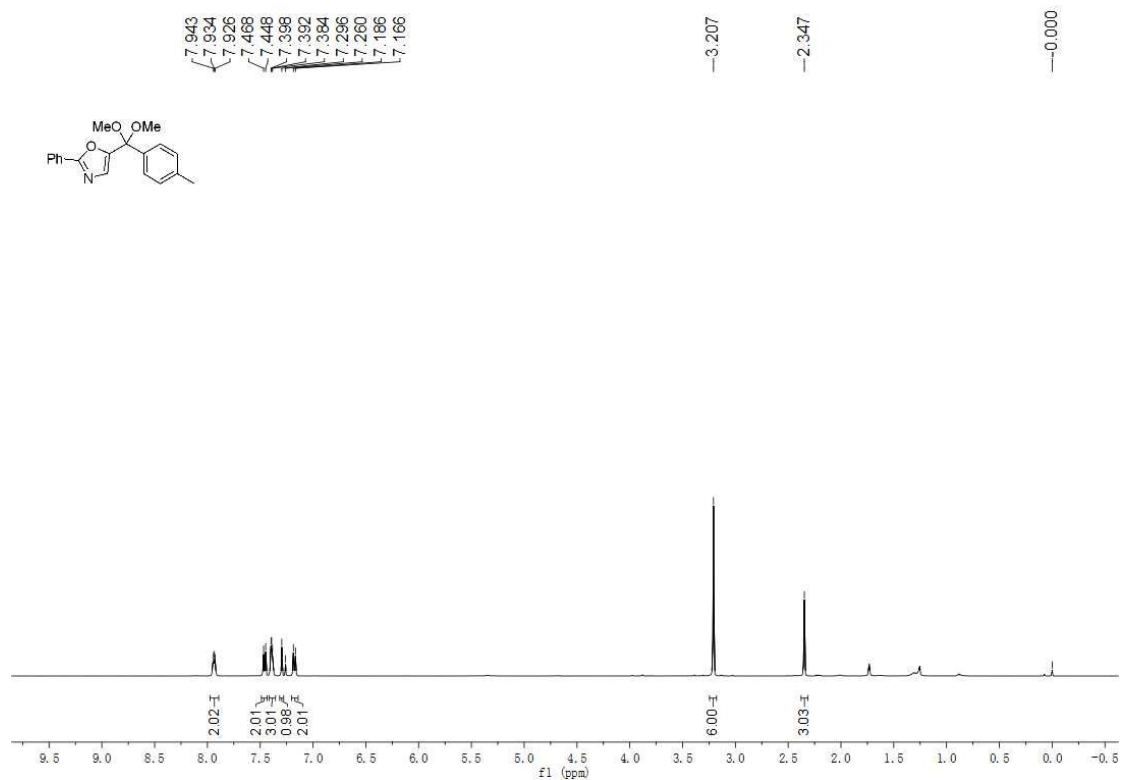

<sup>1</sup>H NMR (400 MHz, CDCl<sub>3</sub>)

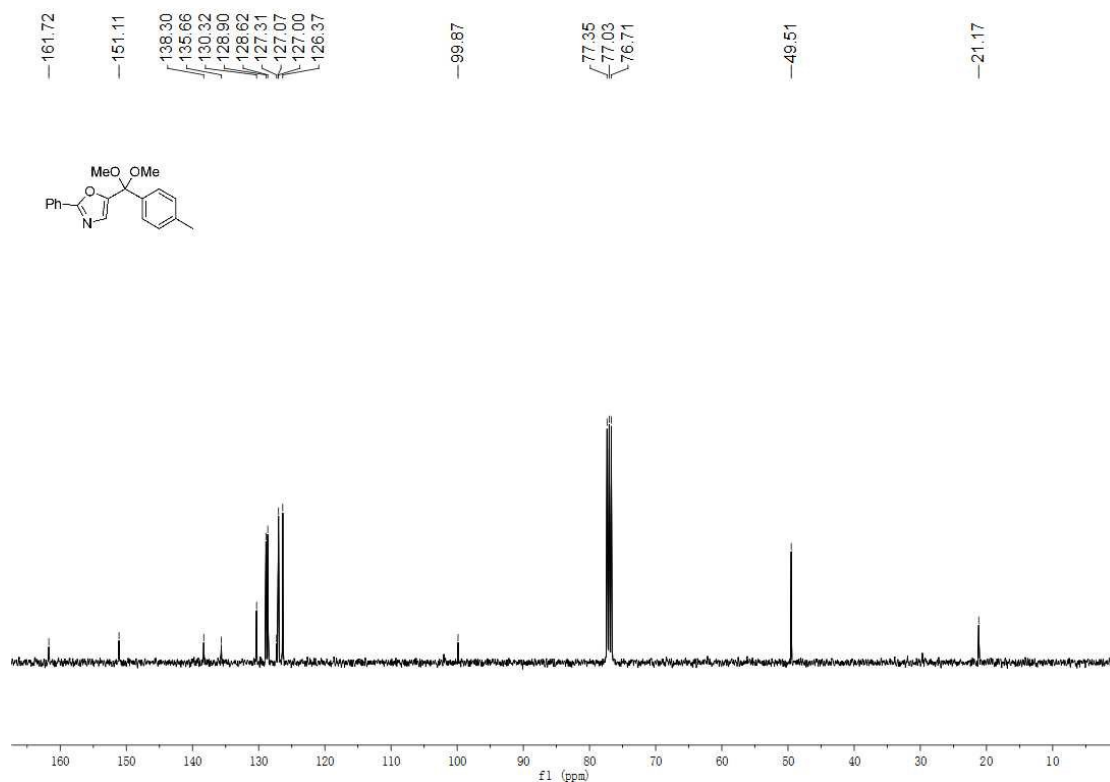

<sup>13</sup>C NMR (100 MHz, CDCl<sub>3</sub>)



**5-((4-(*tert*-Butyl)phenyl)dimethoxymethyl)-2-phenyloxazole(2l):**

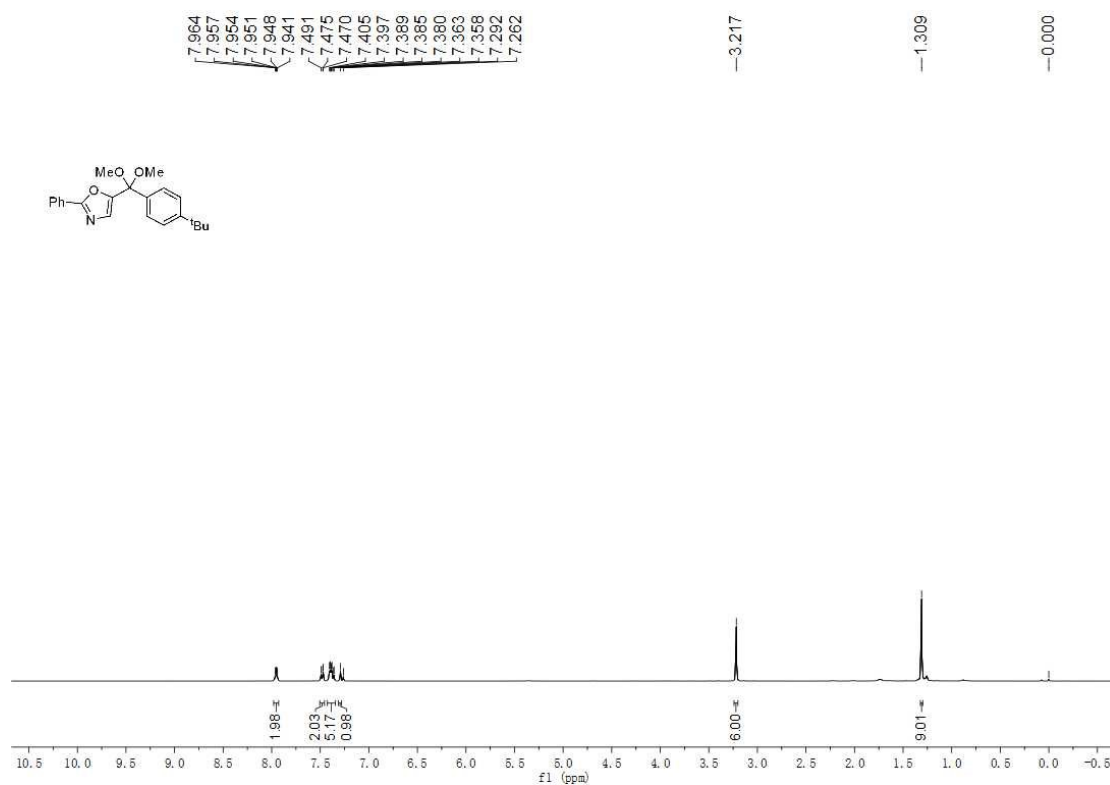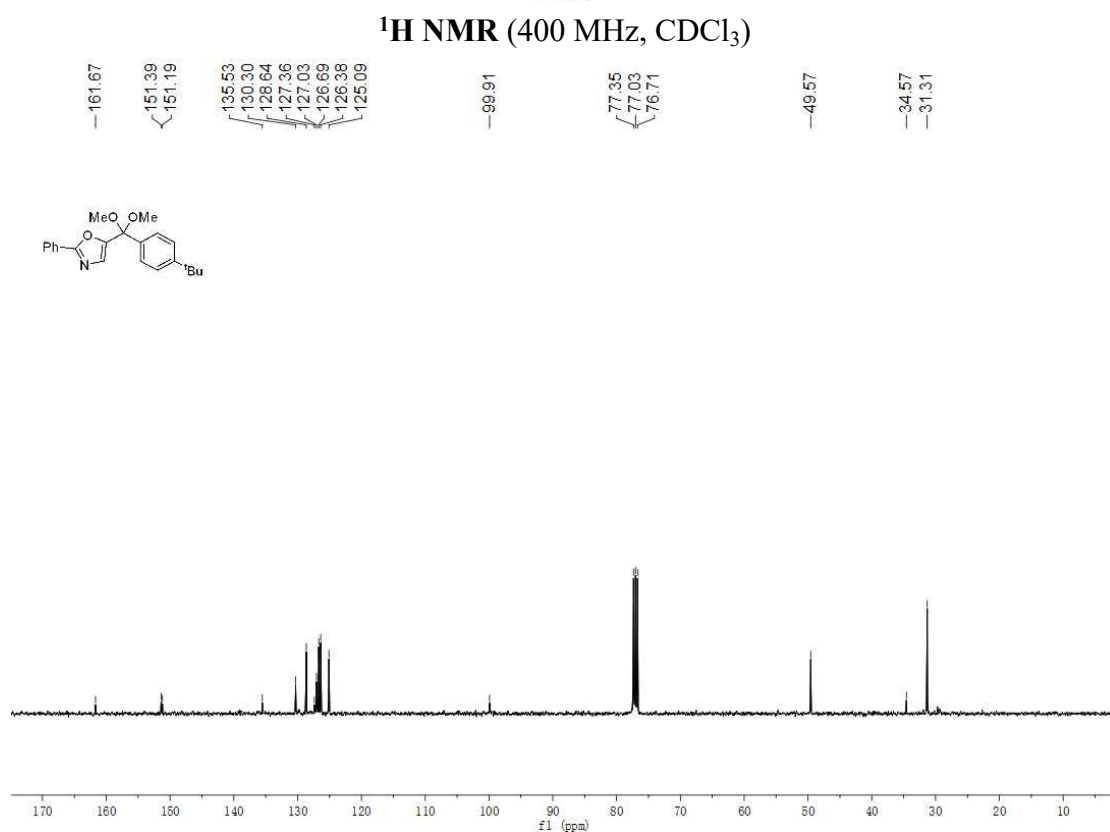

### 5-(Dimethoxy(4-methoxyphenyl)methyl)-2-phenyloxazole (2m):

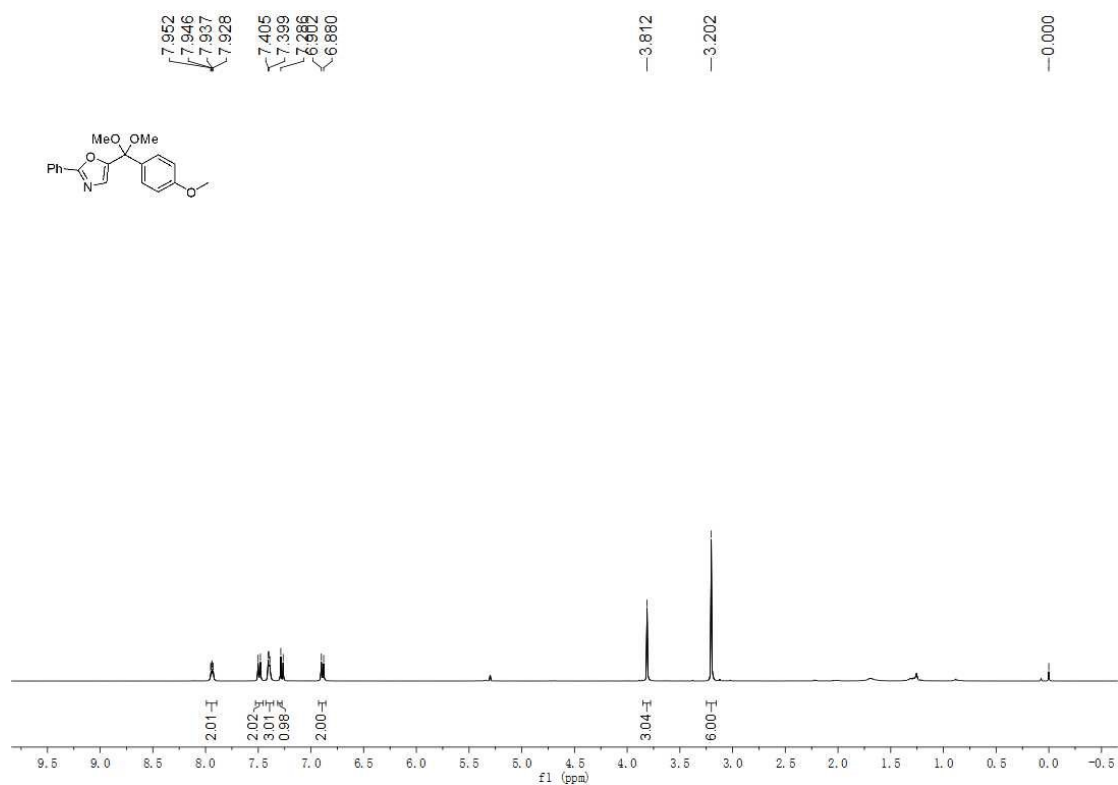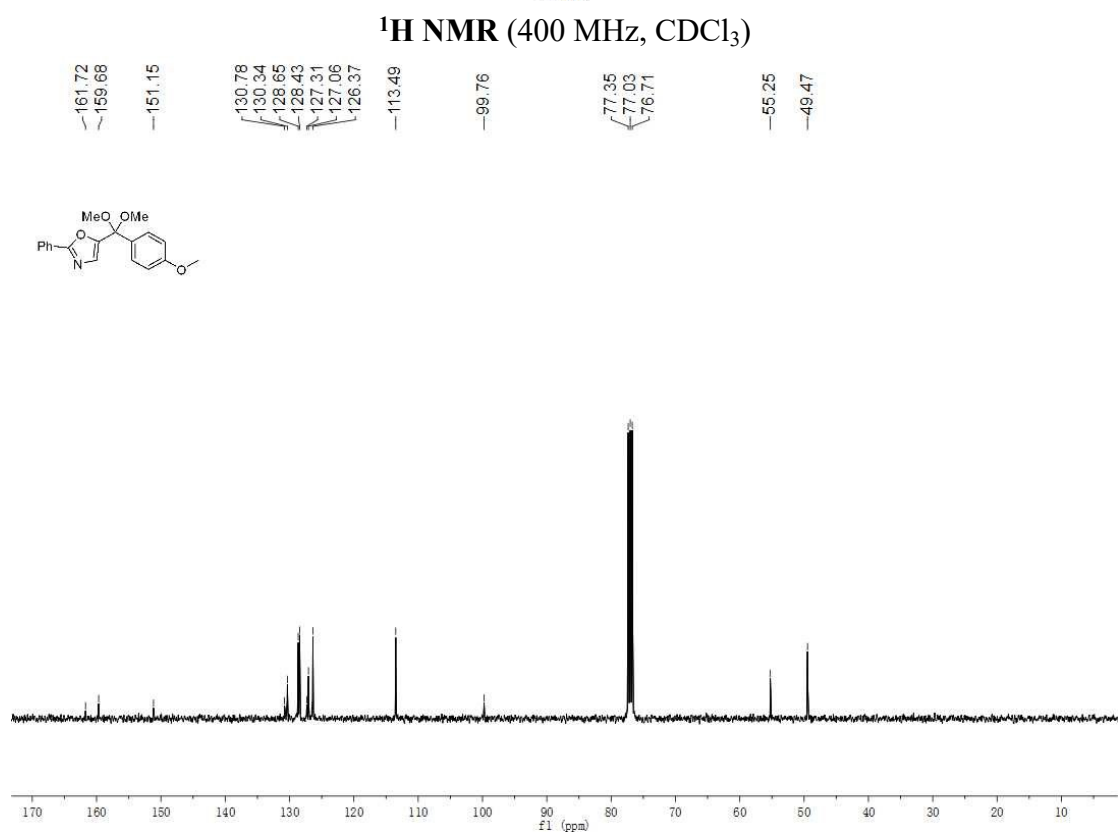

### 5-((4-Fluorophenyl)dimethoxymethyl)-2-phenyloxazole(2n):

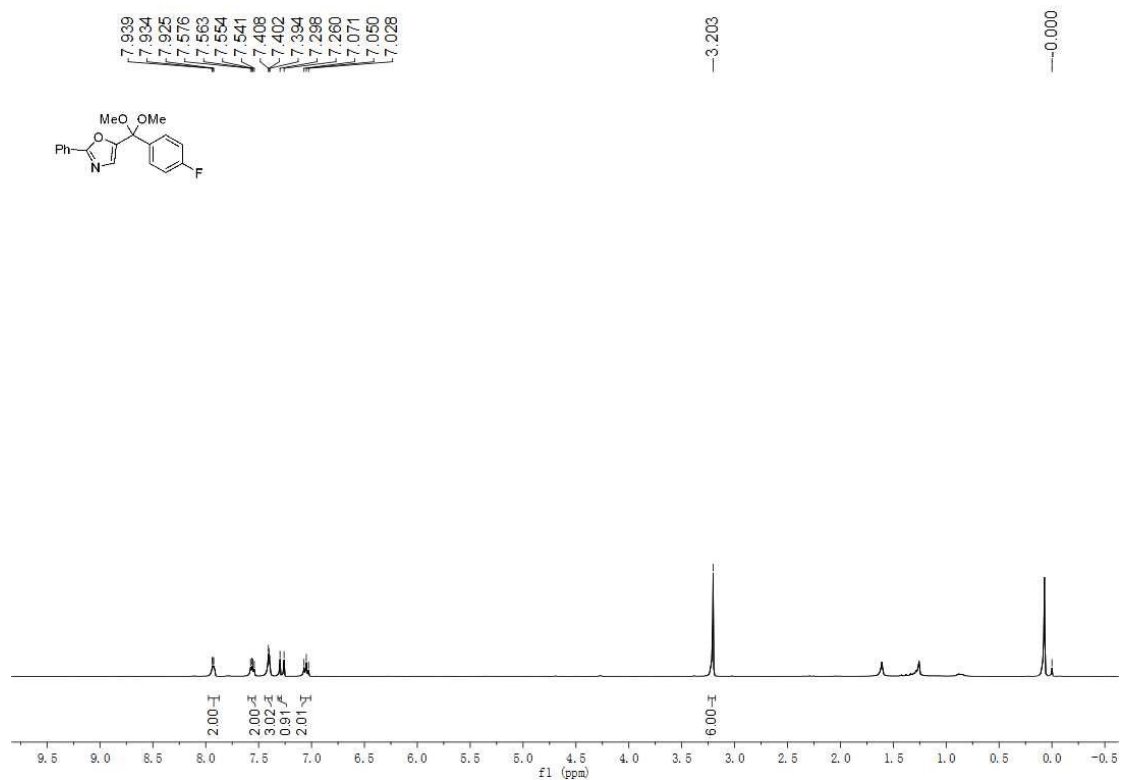

<sup>1</sup>H NMR (400 MHz, CDCl<sub>3</sub>)

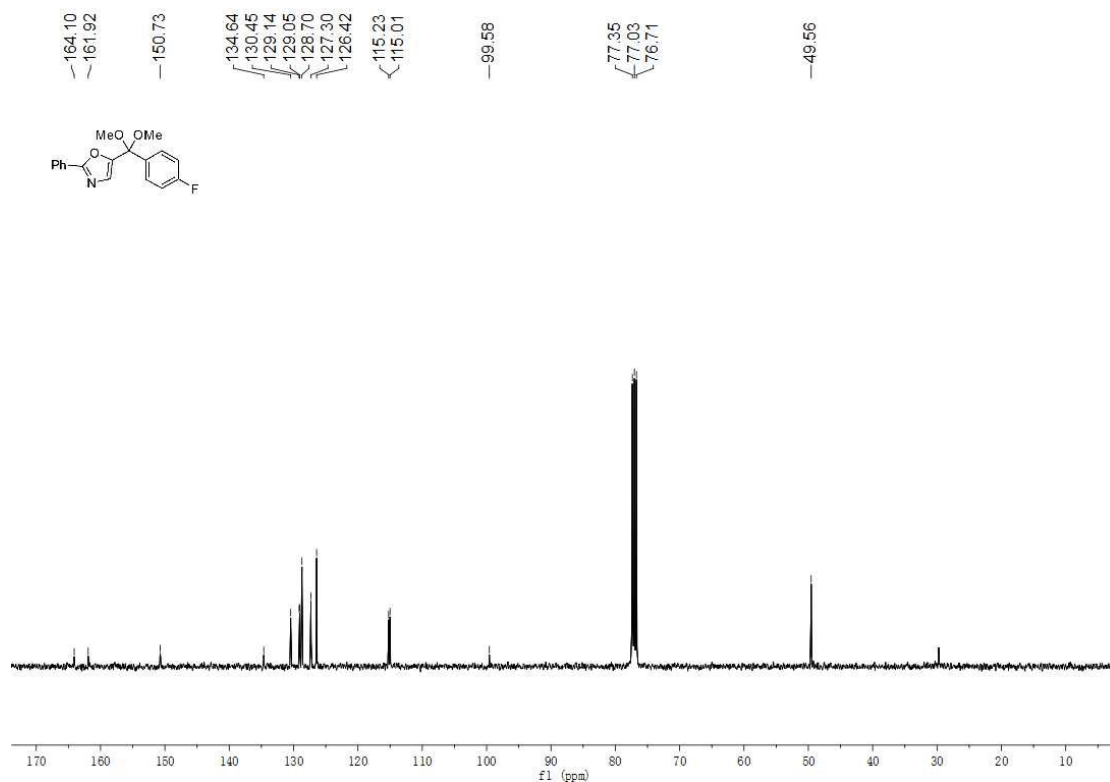

<sup>13</sup>C NMR (100 MHz, CDCl<sub>3</sub>)

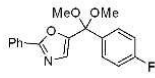

--113.57

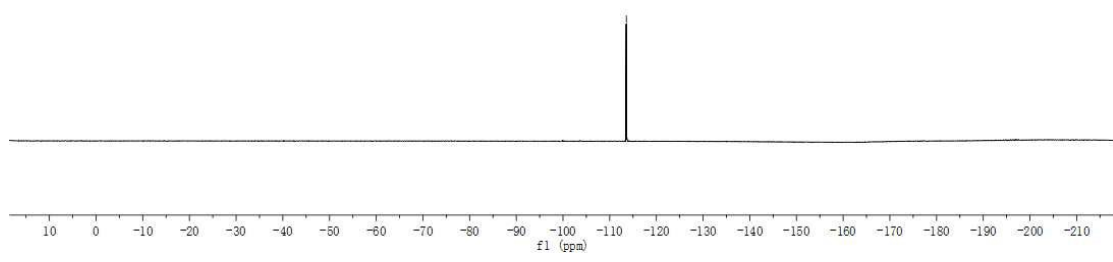

$^{19}\text{F}$  NMR (376 MHz,  $\text{CDCl}_3$ )

### 5-((4-Chlorophenyl)dimethoxymethyl)-2-phenyloxazole (2o):

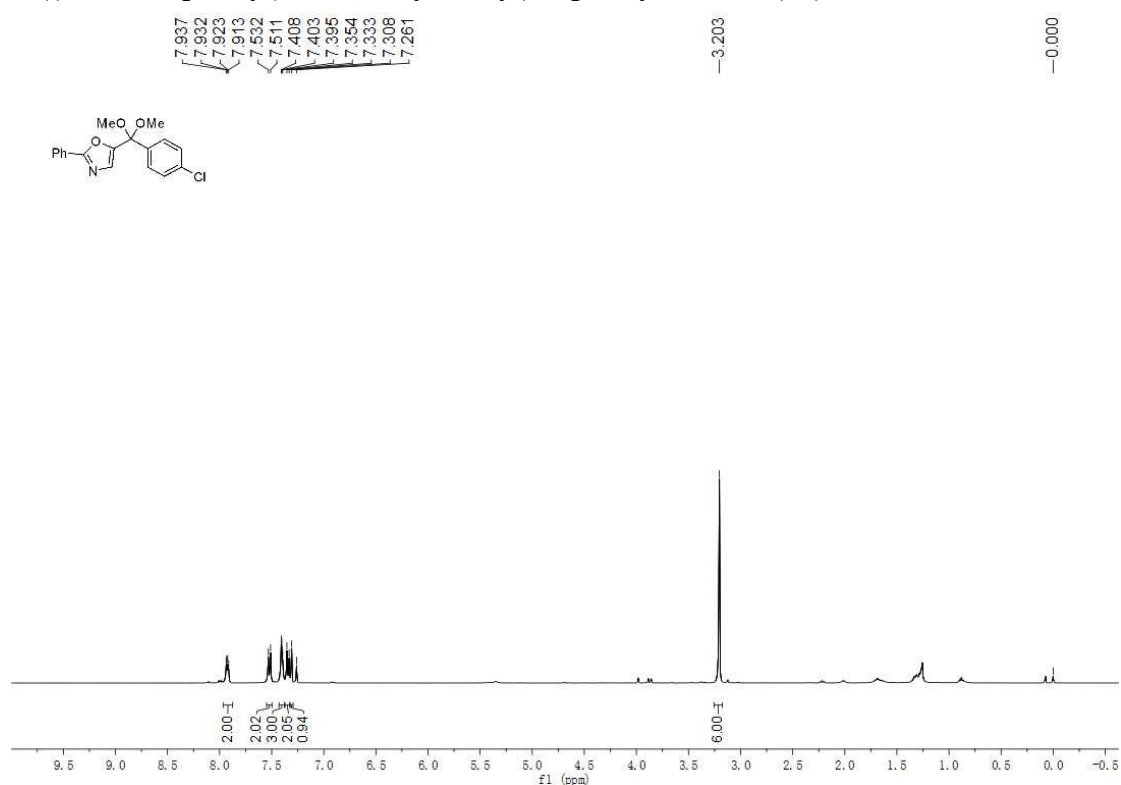

<sup>1</sup>H NMR (400 MHz, CDCl<sub>3</sub>)

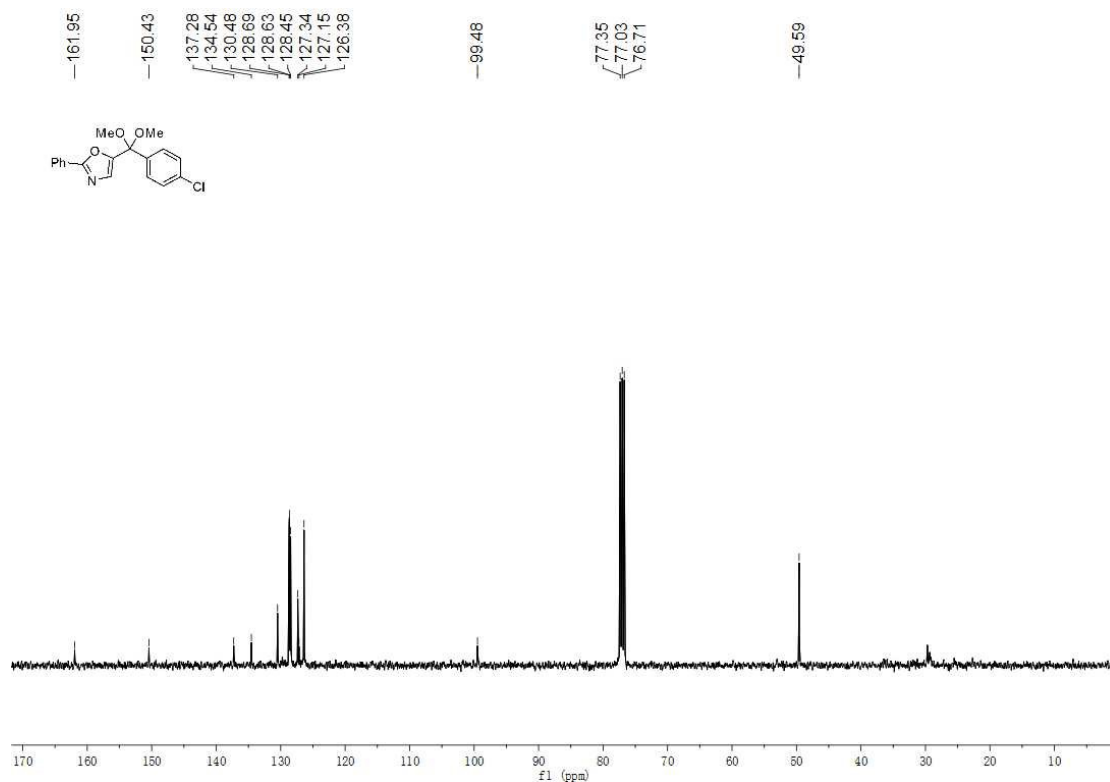

<sup>13</sup>C NMR (100 MHz, CDCl<sub>3</sub>)

### 4-((2-(2-Bromophenyl)oxazol-5-yl)dimethoxymethyl)benzonitrile (2p):

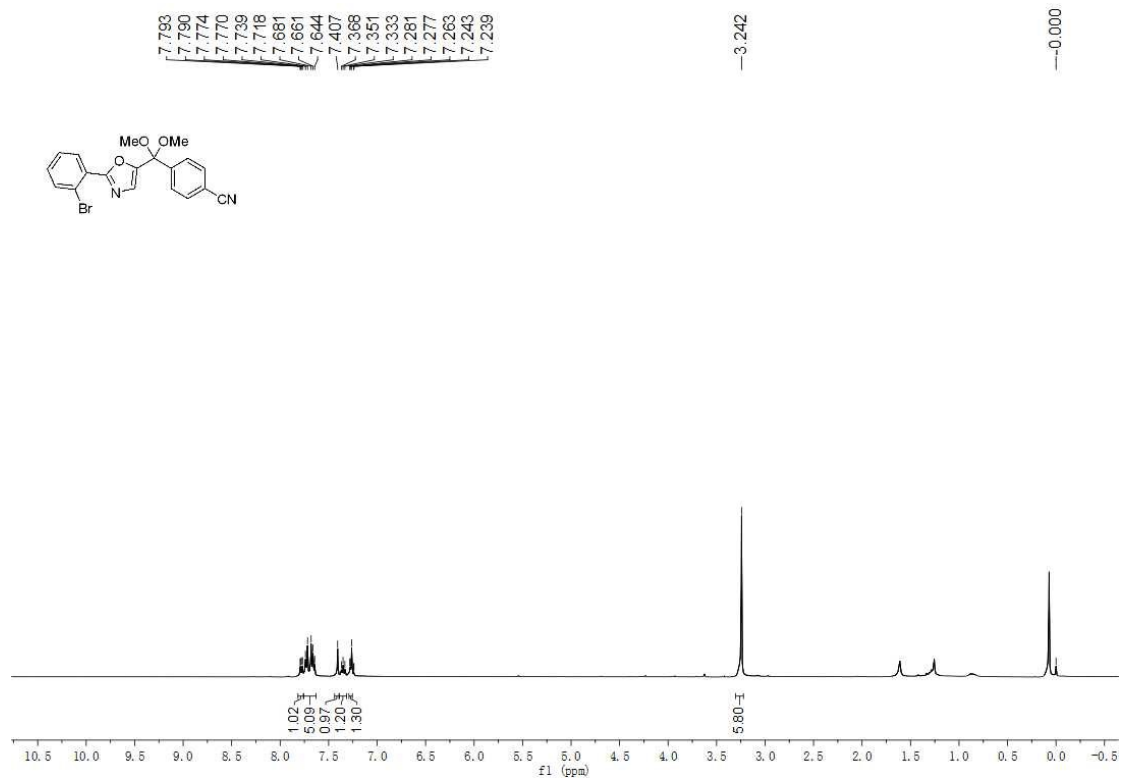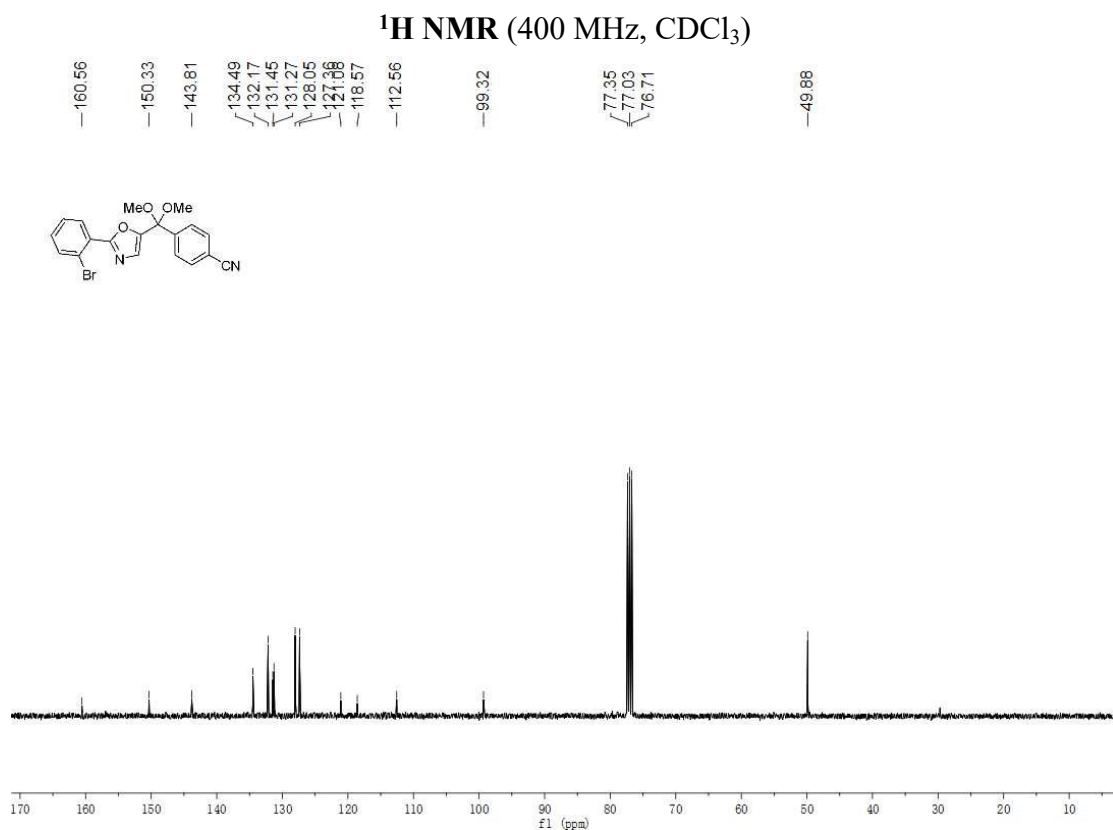

# Ethyl 4-((2-(2-bromophenyl)oxazol-5-yl)dimethoxymethyl)benzoate (2q):

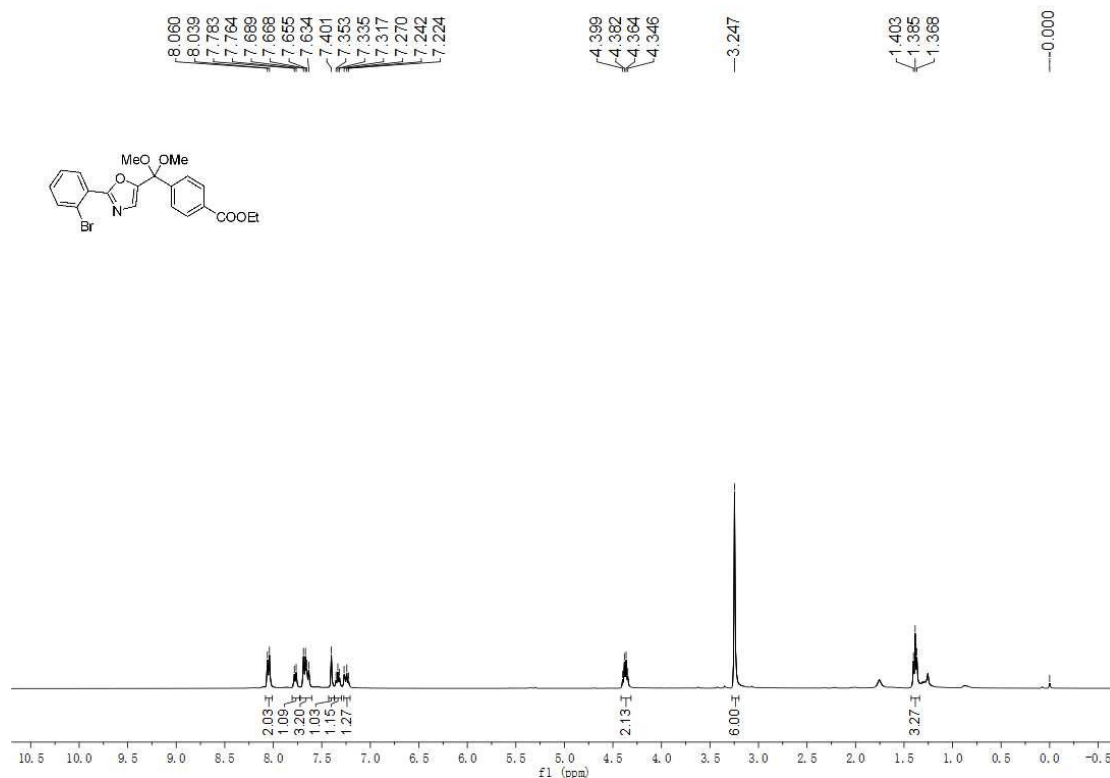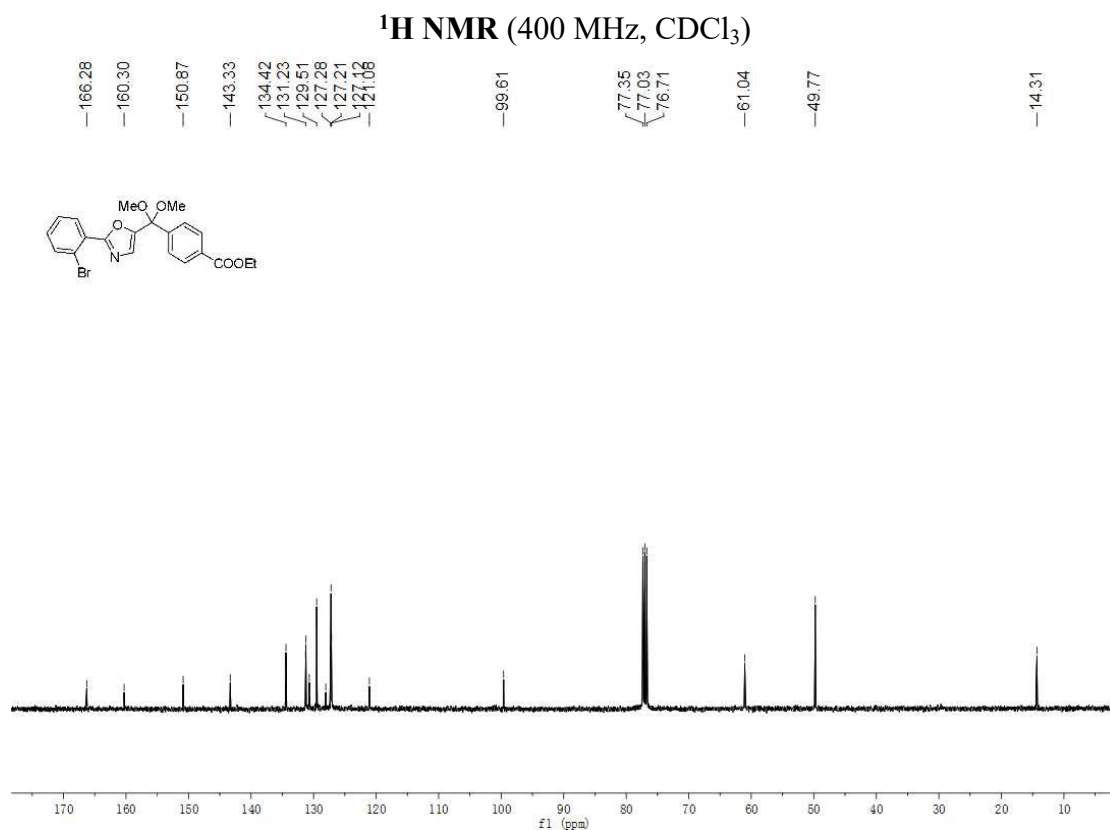

# 5-(Dimethoxy(3-methoxyphenyl)methyl)-2-phenyloxazole (2r):

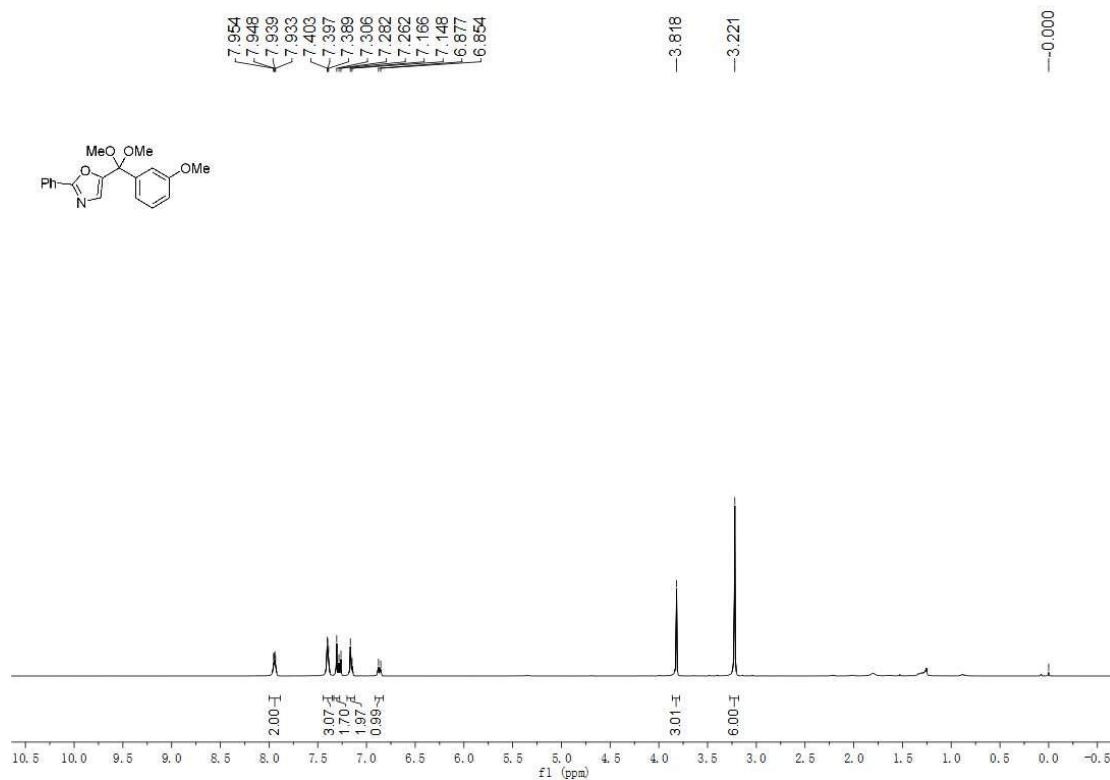

## <sup>1</sup>H NMR (400 MHz, CDCl<sub>3</sub>)

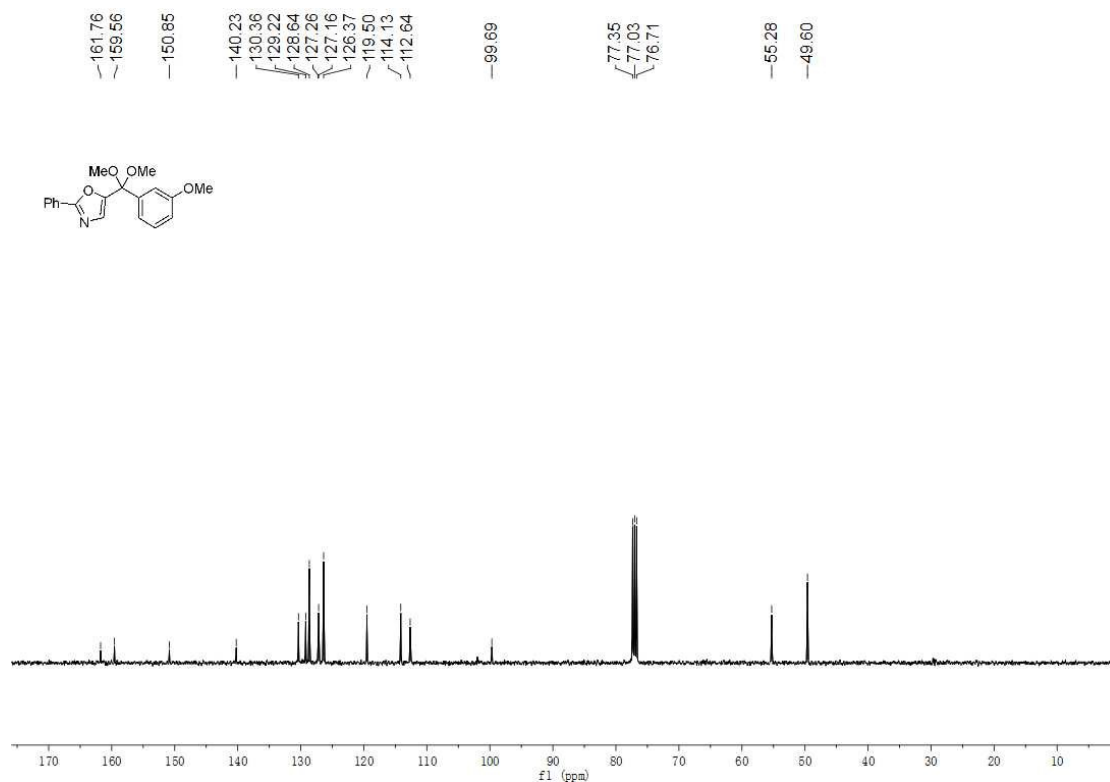

## <sup>13</sup>C NMR (100 MHz, CDCl<sub>3</sub>)



## 2-(2-Bromophenyl)-5-((3-chlorophenyl)dimethoxymethyl)oxazole (2s):

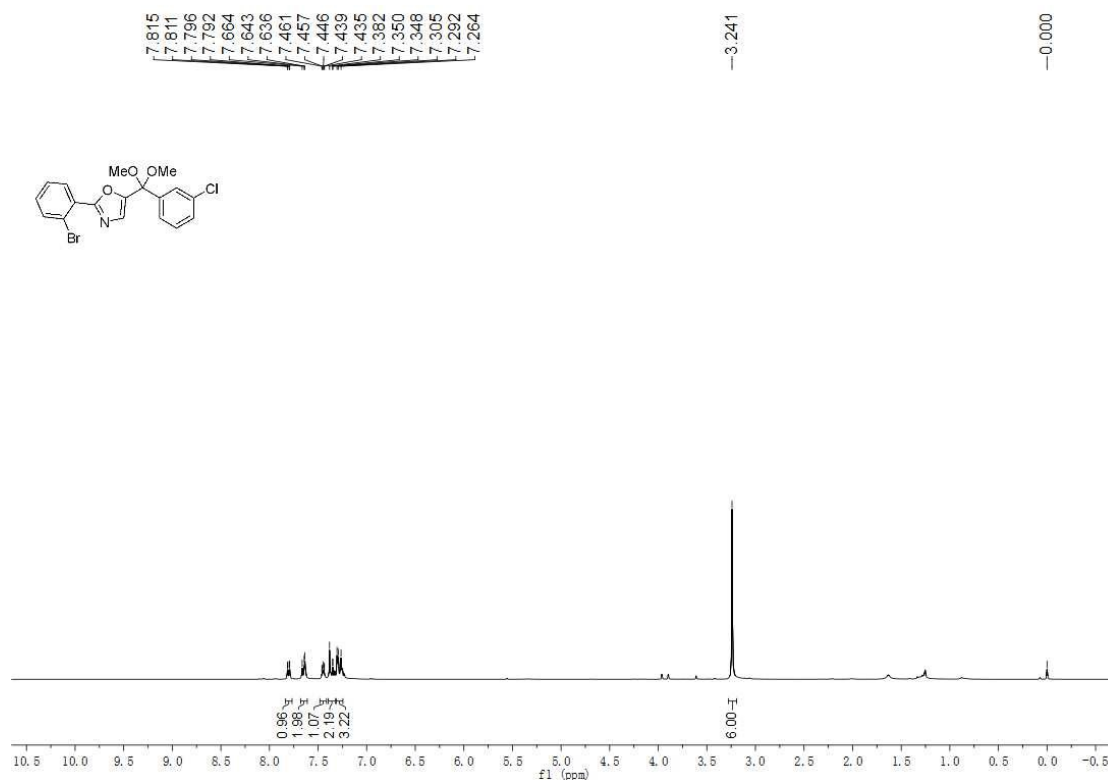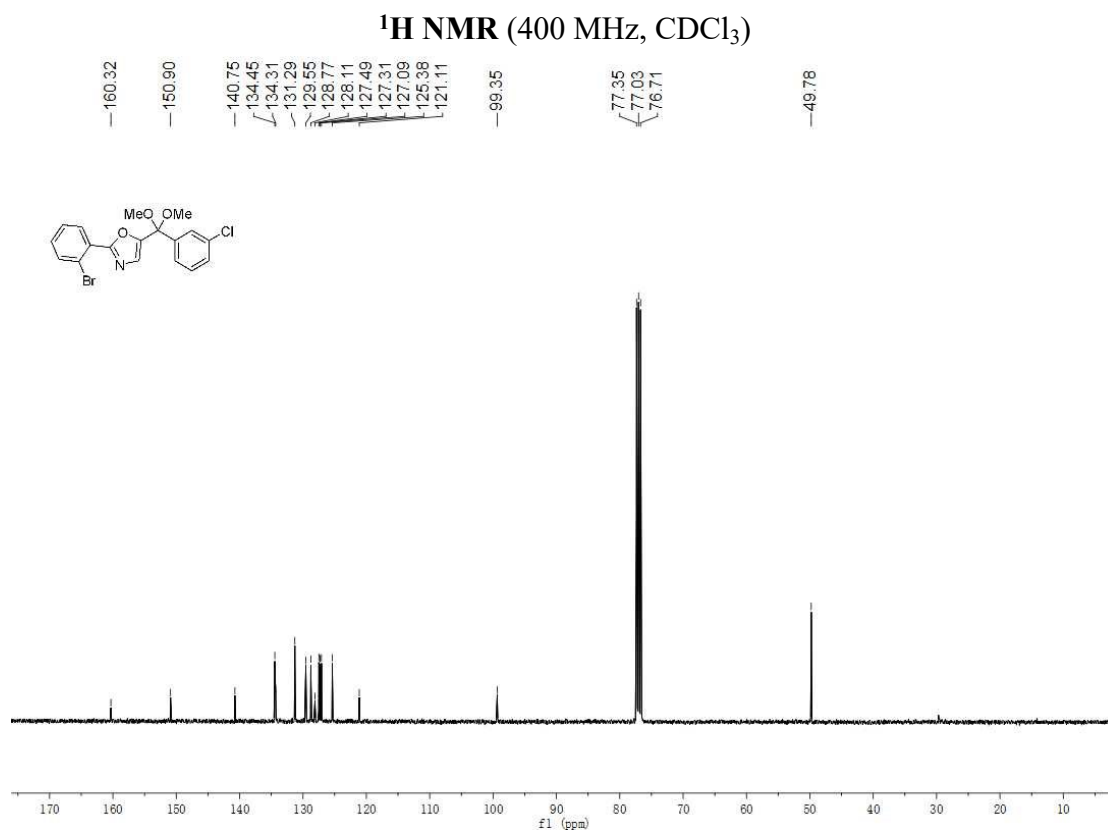

**5-((3-Chlorophenyl)dimethoxymethyl)-2-(2-iodophenyl)oxazole (2t):**

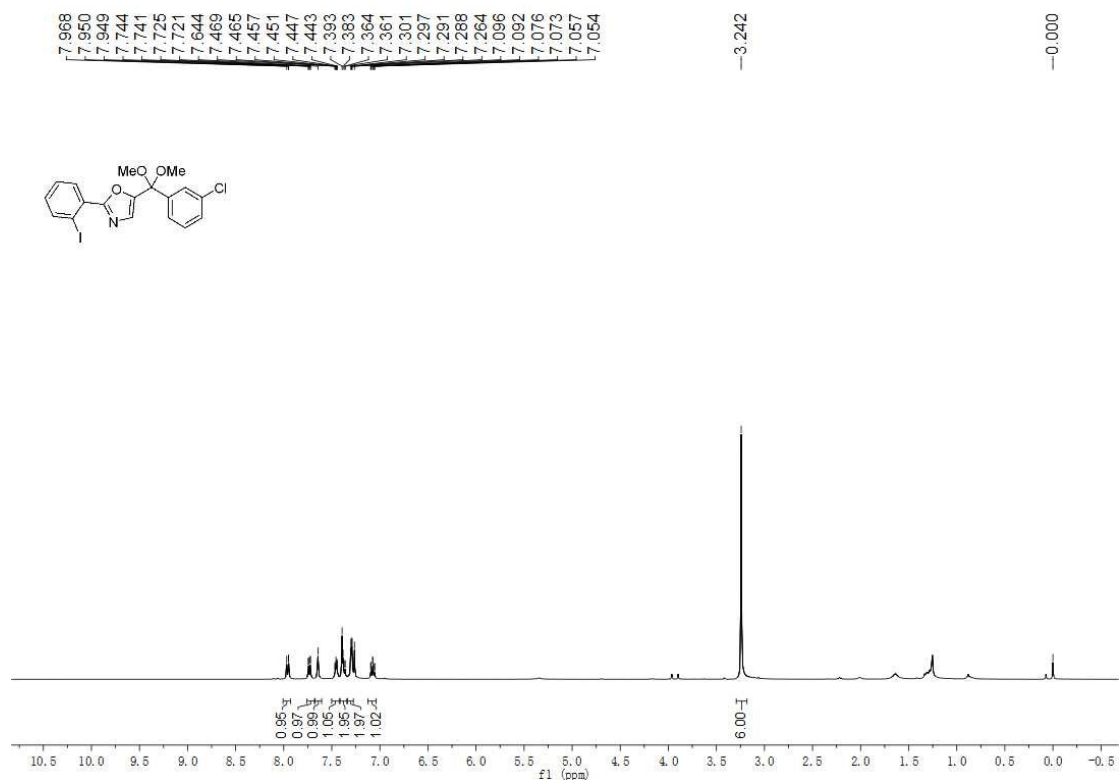

**<sup>1</sup>H NMR (400 MHz, CDCl<sub>3</sub>)**

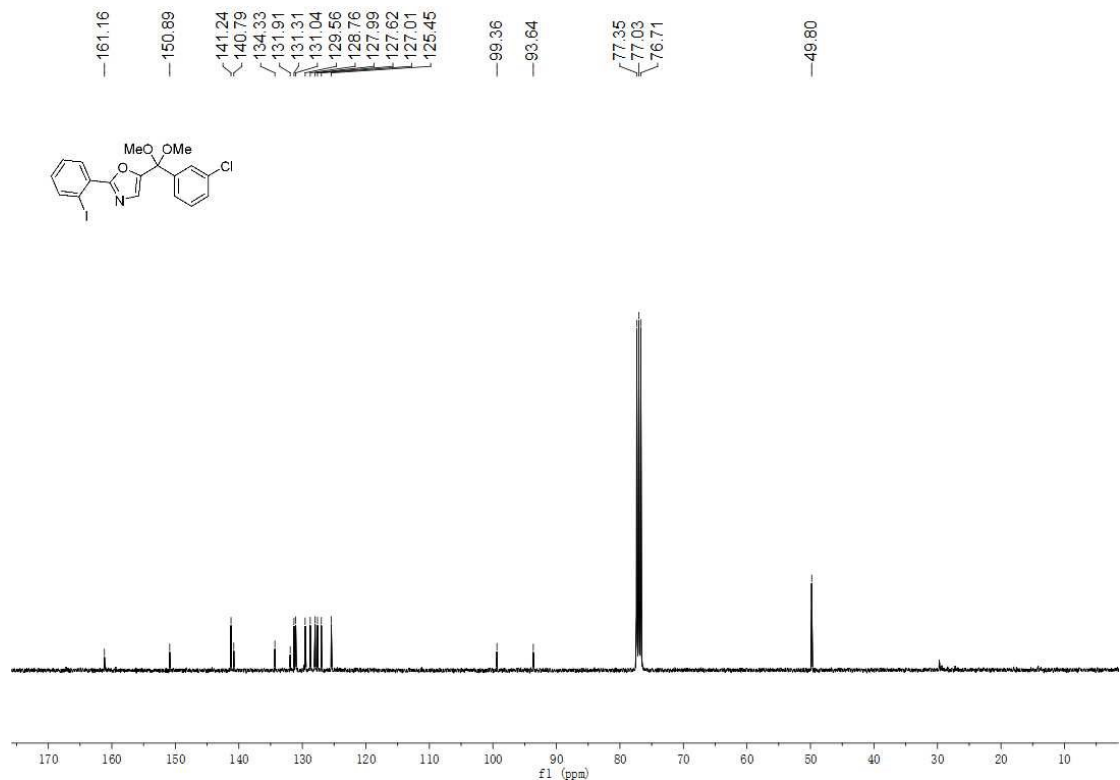

**<sup>13</sup>C NMR (100 MHz, CDCl<sub>3</sub>)**

### 5-((2-Bromophenyl)dimethoxymethyl)-2-phenyloxazole (2u):

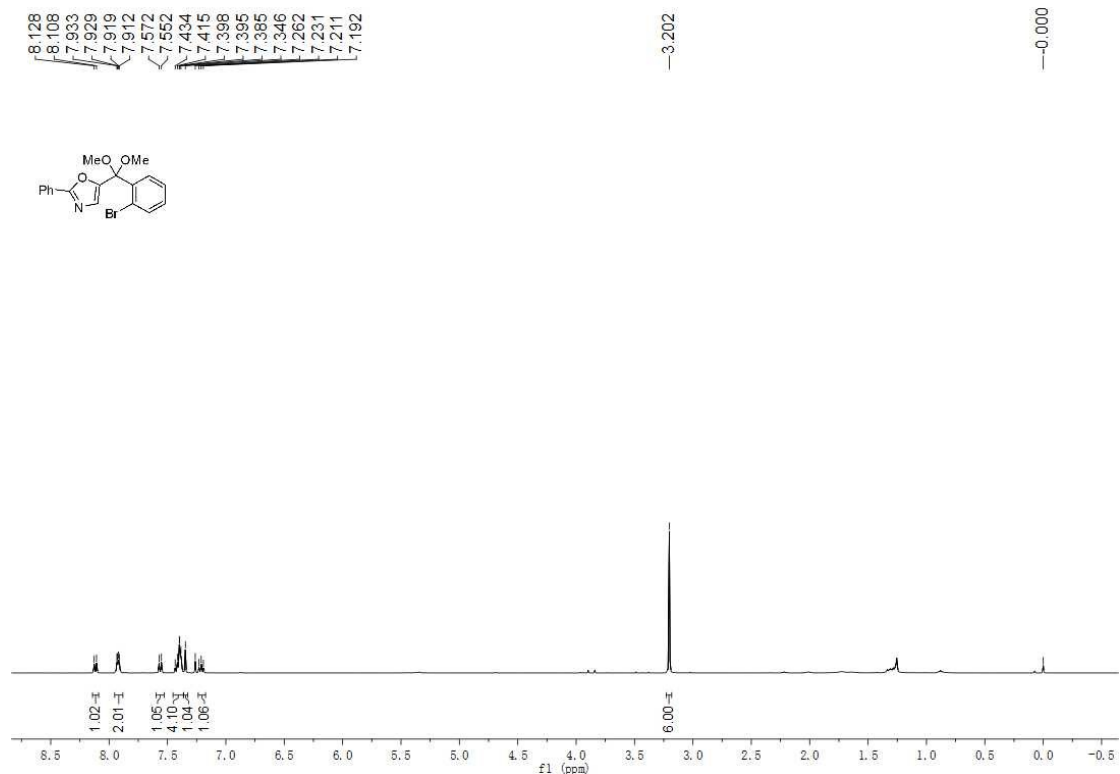

<sup>1</sup>H NMR (400 MHz, CDCl<sub>3</sub>)

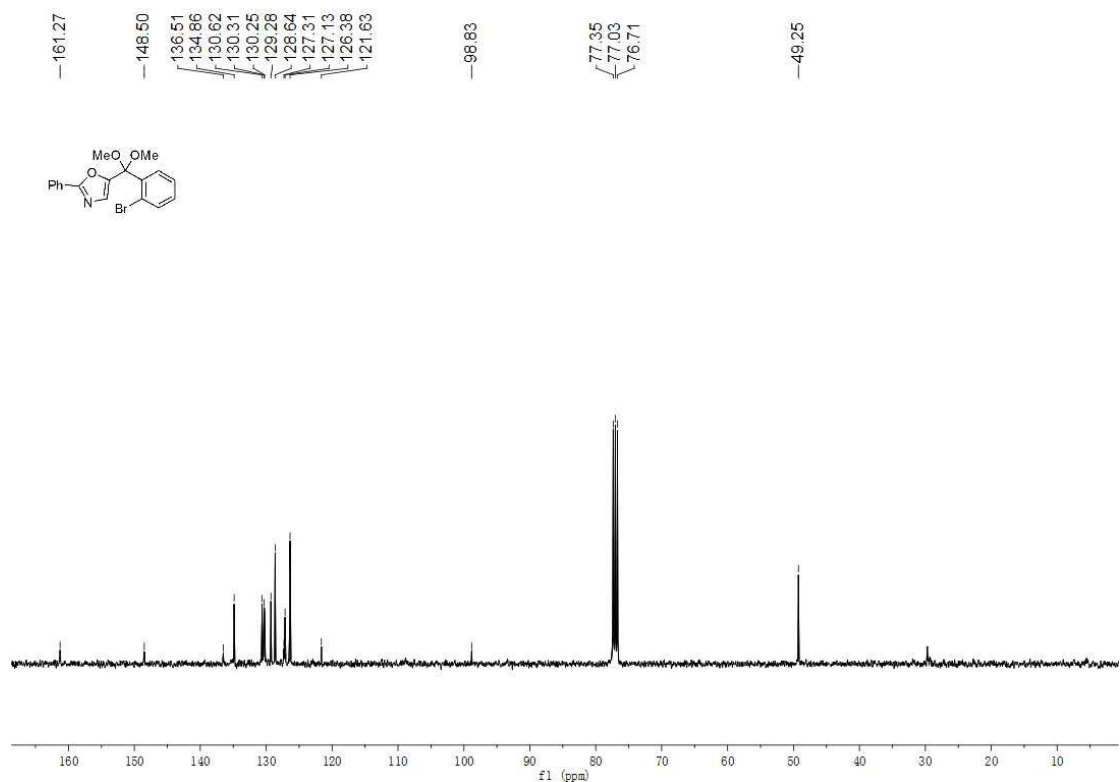

<sup>13</sup>C NMR (100 MHz, CDCl<sub>3</sub>)

**5-((2-Bromo-4-methylphenyl)dimethoxymethyl)-2-phenyloxazole (2v):**

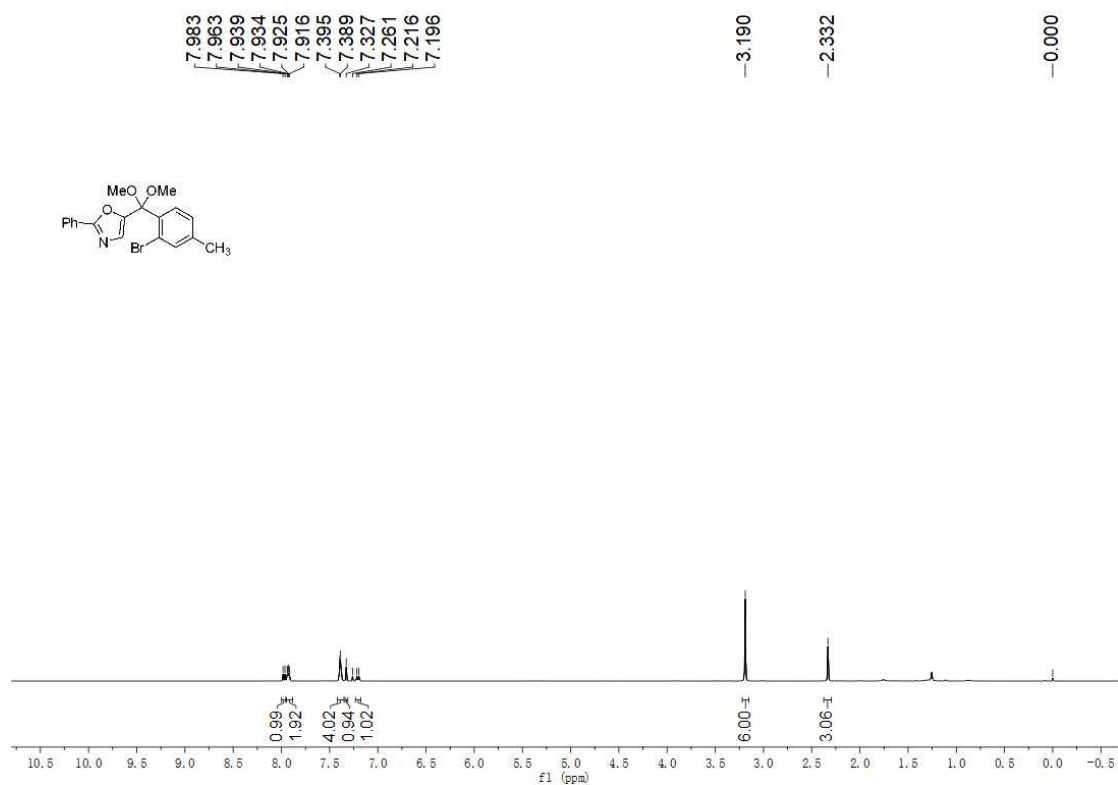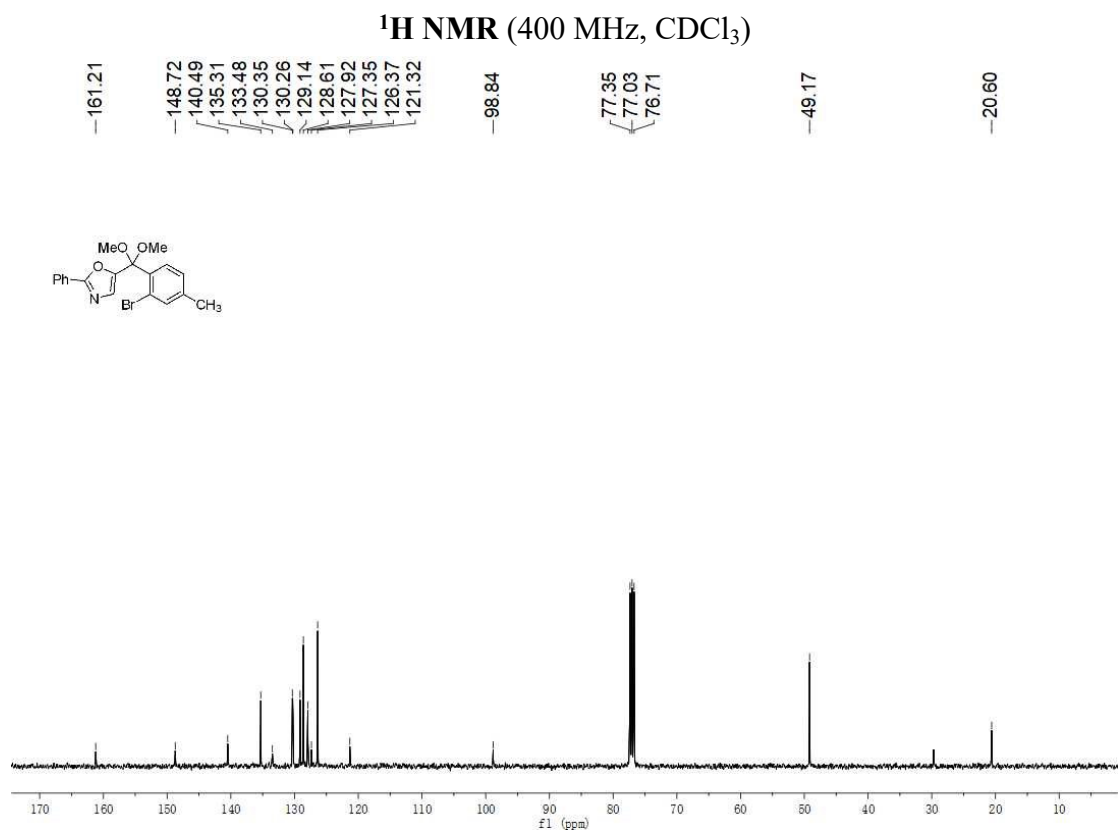

# 5-((2-Bromo-4-chlorophenyl)dimethoxymethyl)-2-phenyloxazole (2w):

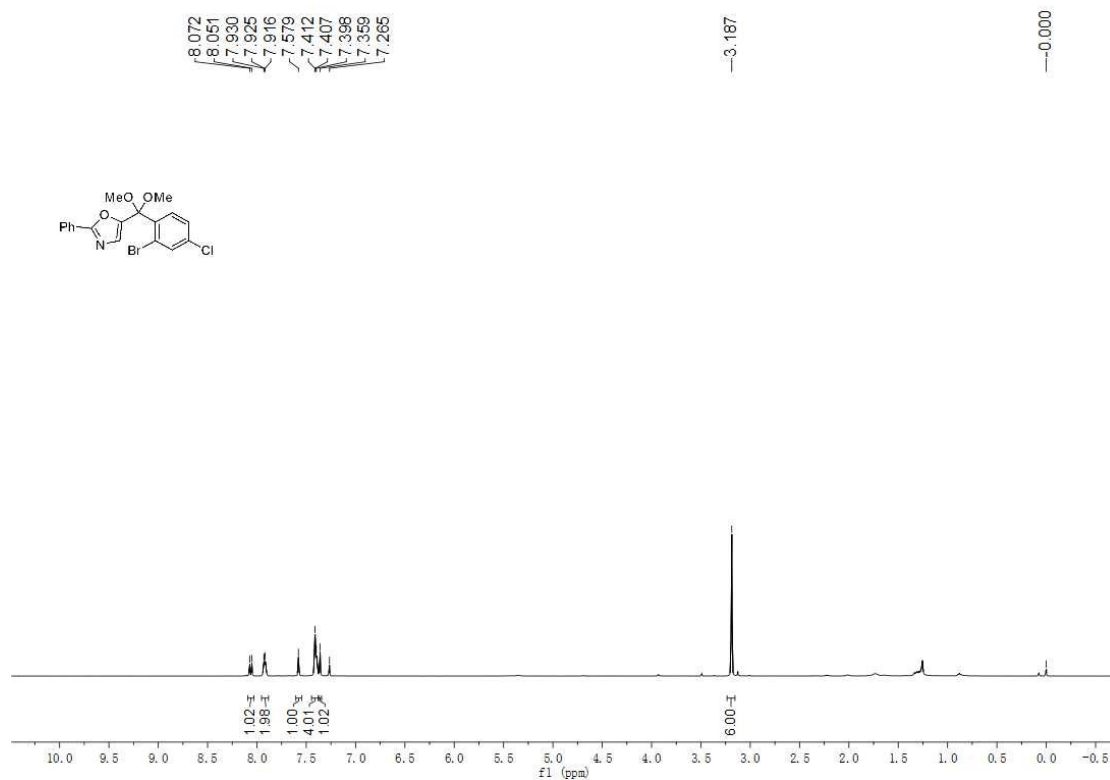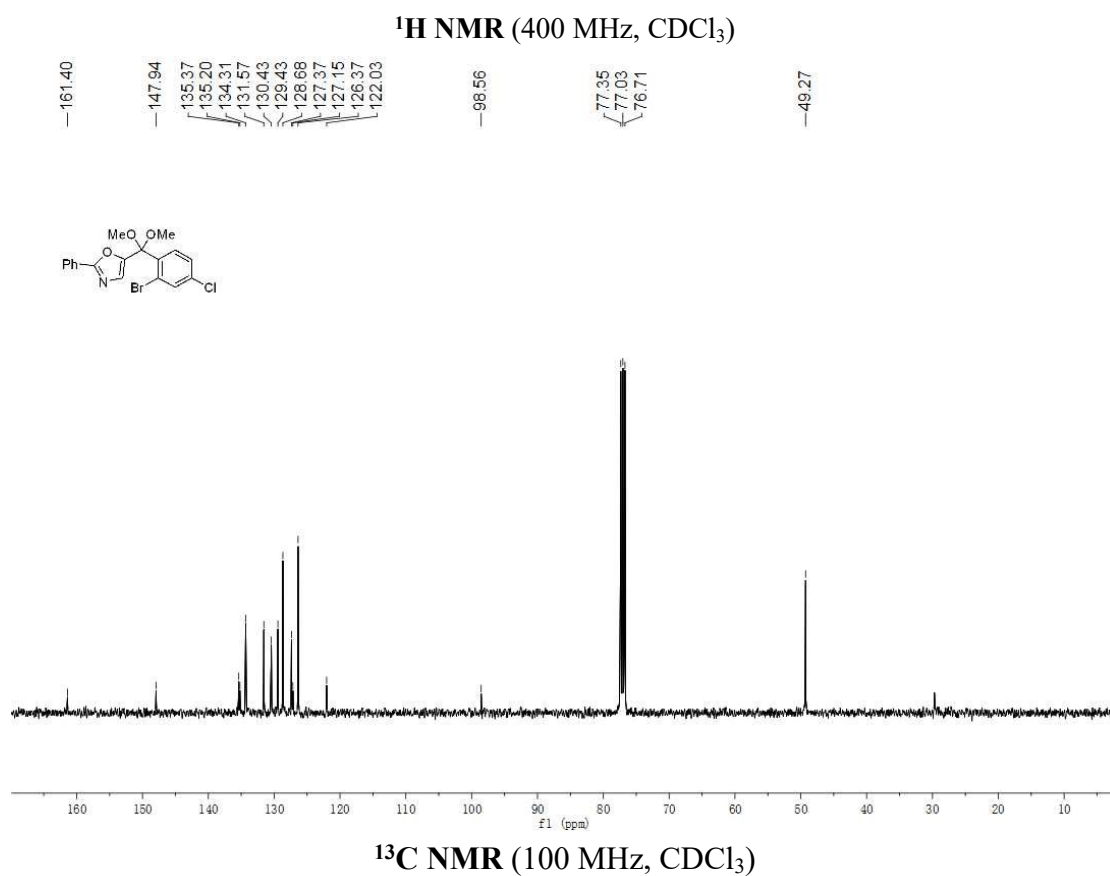

**5-((2,4-Dimethylphenyl)dimethoxymethyl)-2-phenyloxazole (2x):**

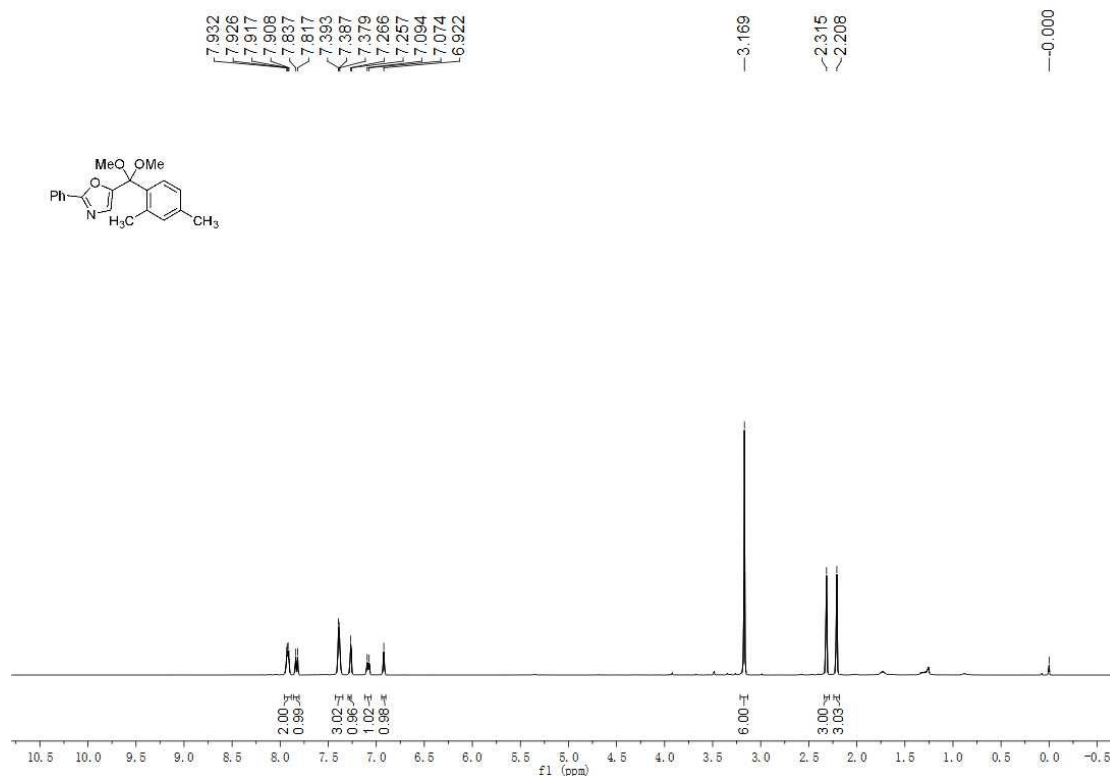

<sup>1</sup>H NMR (400 MHz, CDCl<sub>3</sub>)

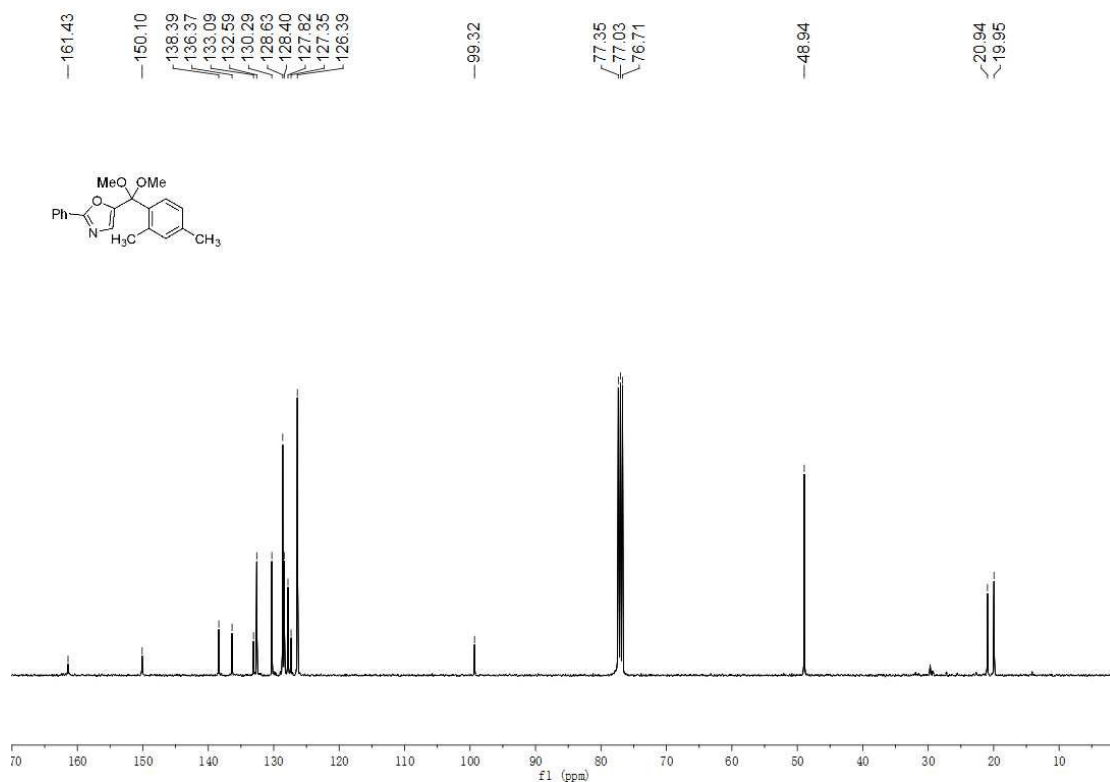

<sup>13</sup>C NMR (100 MHz, CDCl<sub>3</sub>)

### 5-(Dimethoxy(naphthalen-1-yl)methyl)-2-phenyloxazole (2y):

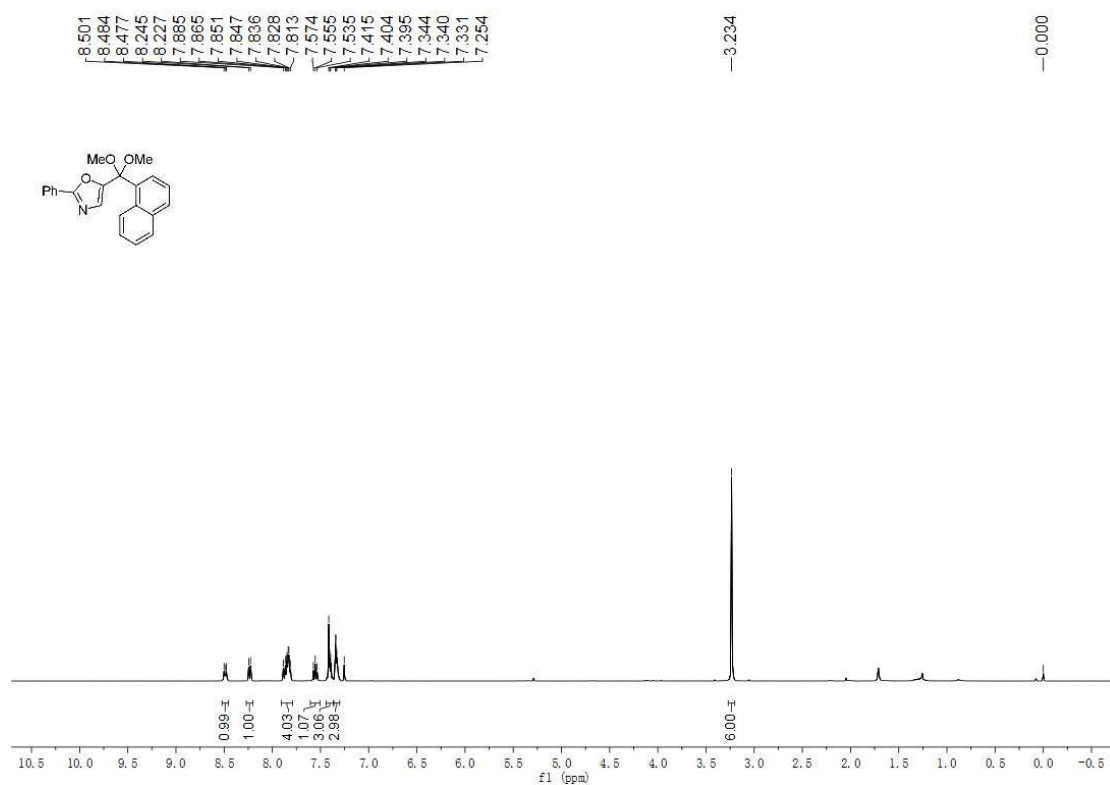

<sup>1</sup>H NMR (400 MHz, CDCl<sub>3</sub>)

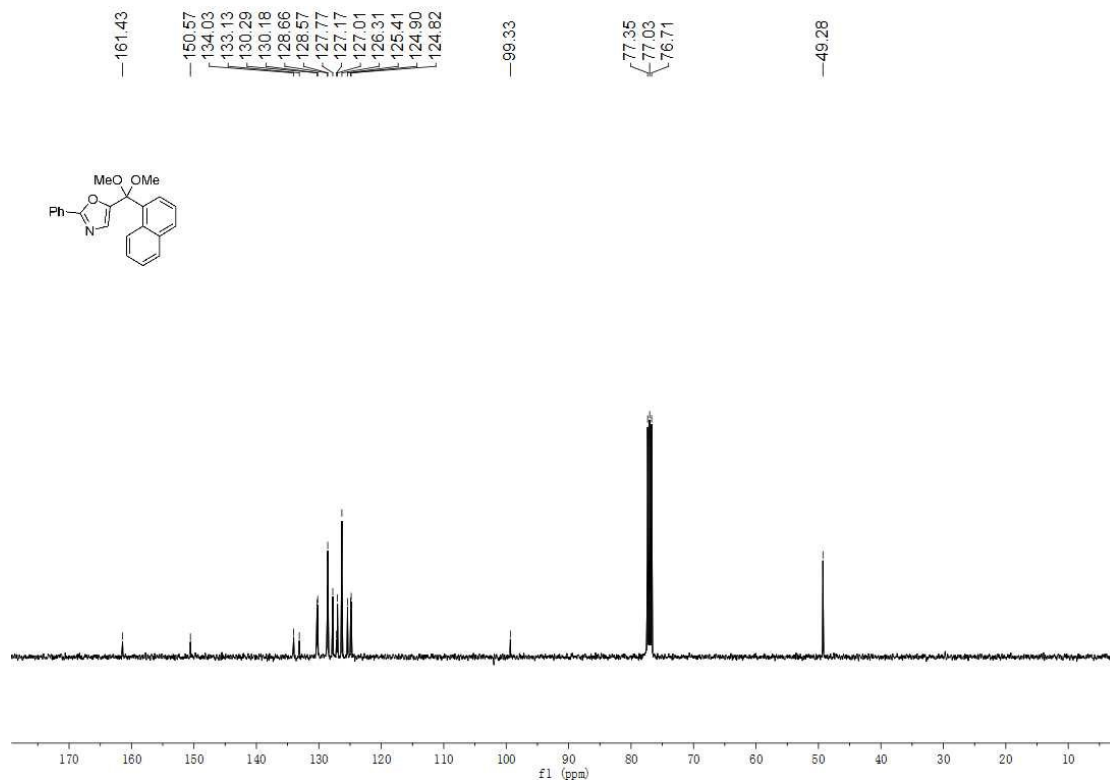

<sup>13</sup>C NMR (100 MHz, CDCl<sub>3</sub>)

**5-(dimethoxy(thiophen-2-yl)methyl)-2-phenyloxazole(2z):**

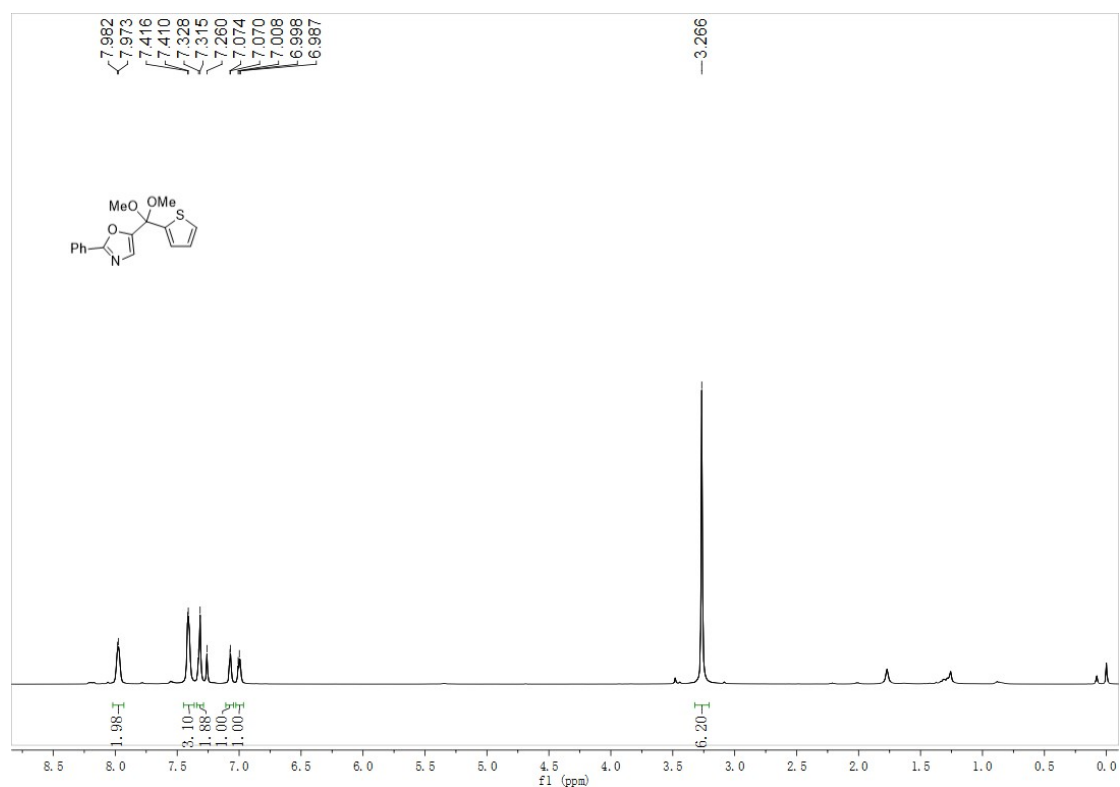

**<sup>1</sup>H NMR (400 MHz, CDCl<sub>3</sub>)**

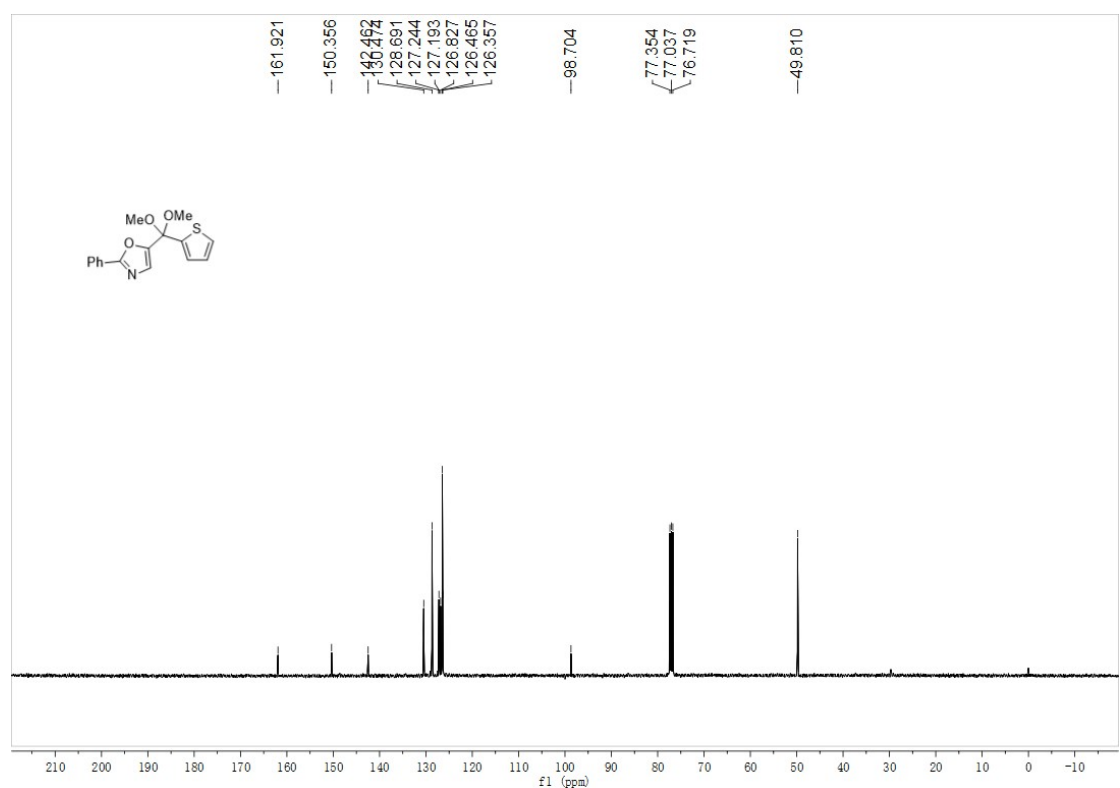

**<sup>13</sup>C NMR (100 MHz, CDCl<sub>3</sub>)**



### 5-(dimethoxy(phenyl)methyl)-2-(pyridin-4-yl)oxazole (2aa):

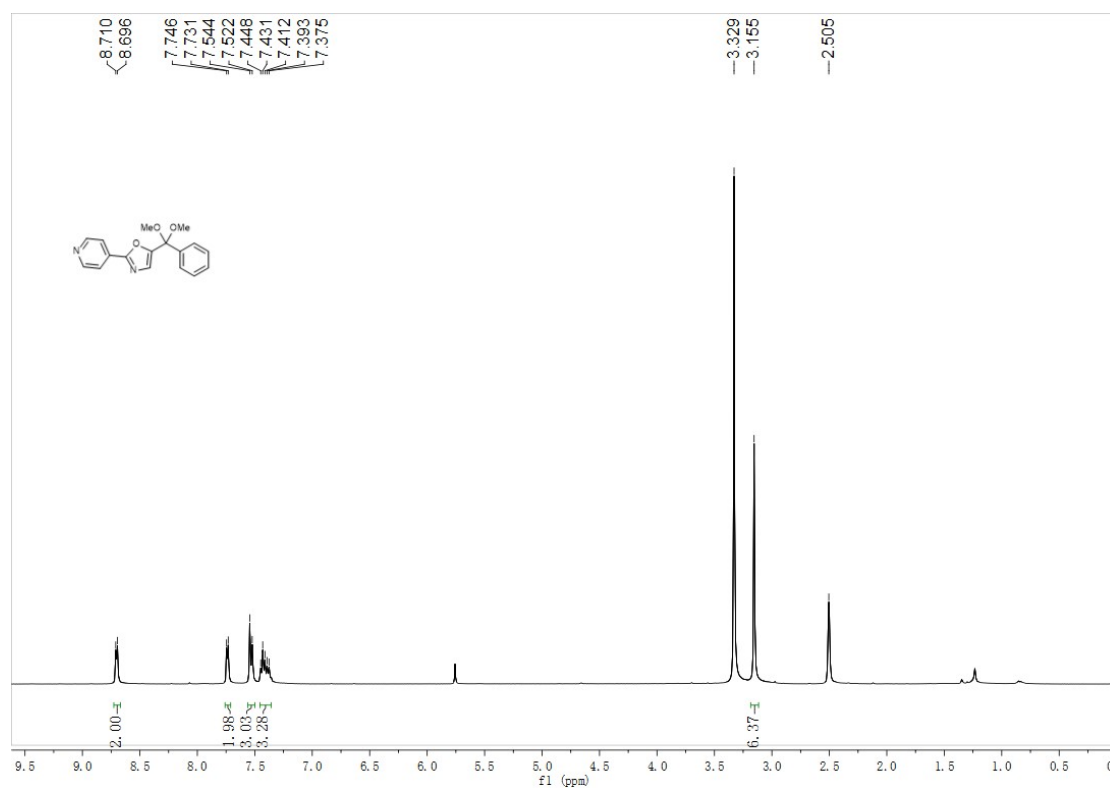

<sup>1</sup>H NMR (400 MHz, DMSO-*d*<sub>6</sub>)

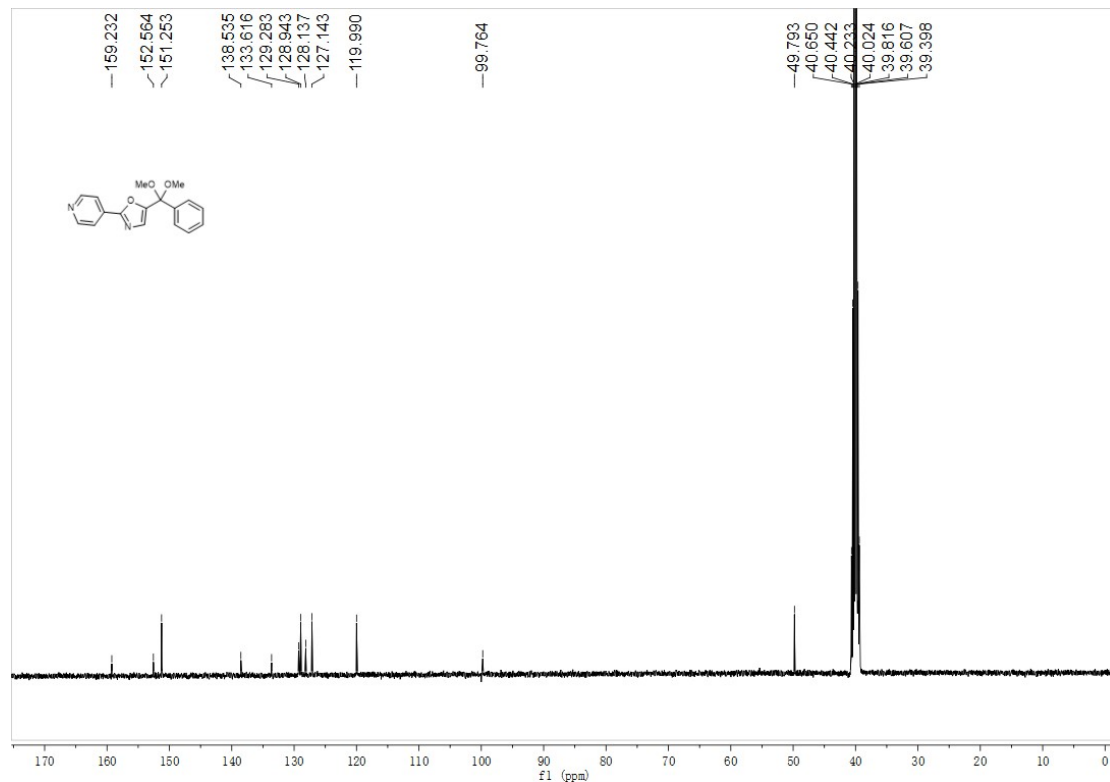

<sup>13</sup>C NMR (100 MHz, DMSO-*d*<sub>6</sub>)

**5-(Diethoxy(phenyl)methyl)-2-(2-iodophenyl)oxazole (2ab):**

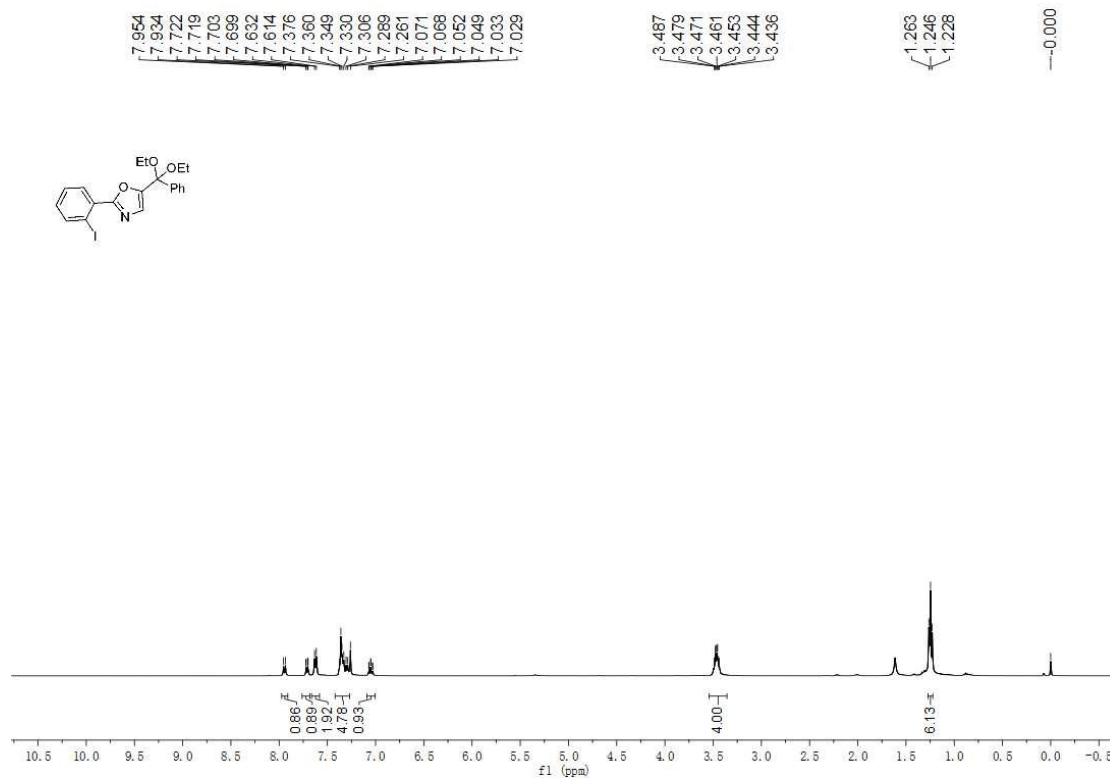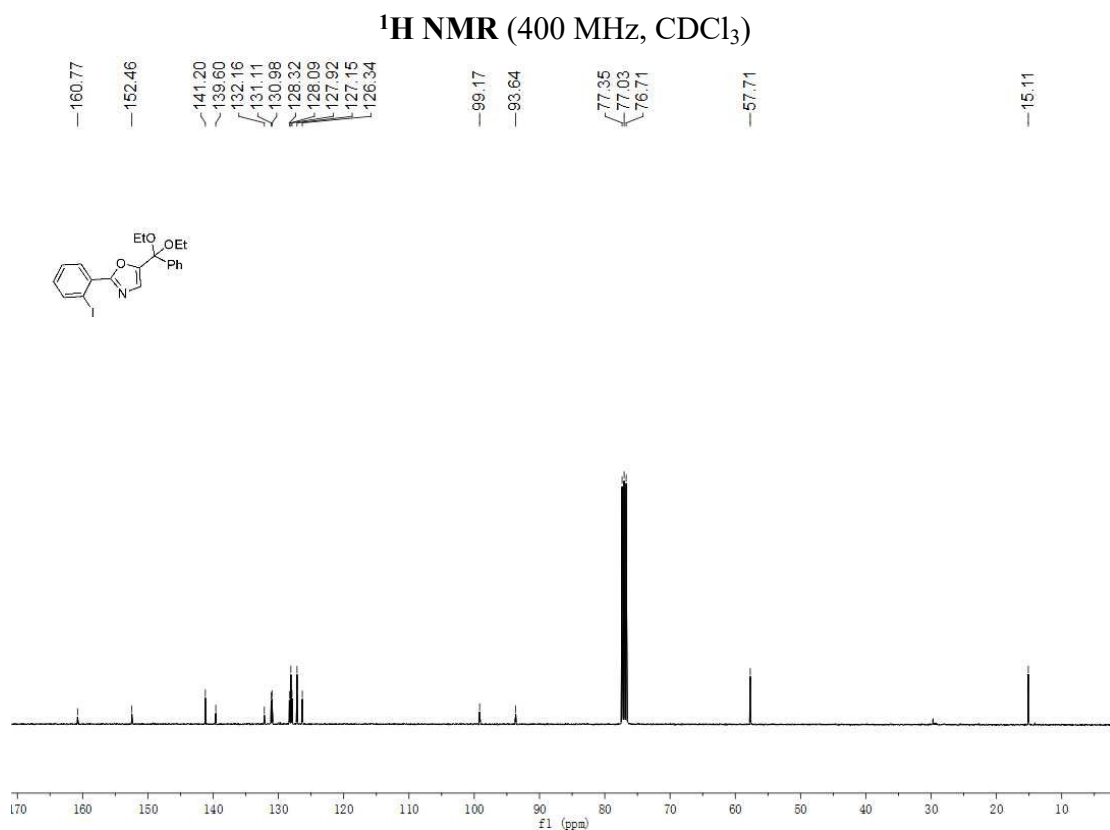

**2-phenyl-5-(phenylpropoxymethyl)oxazole (2ac):**

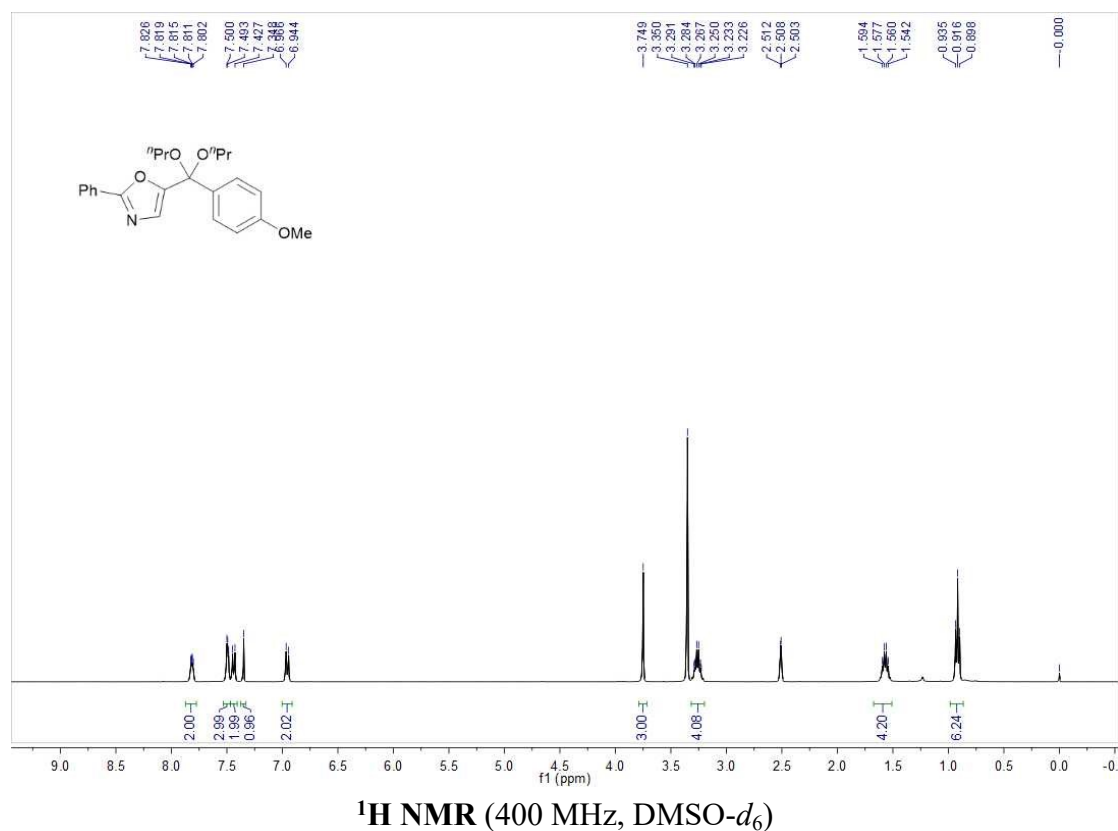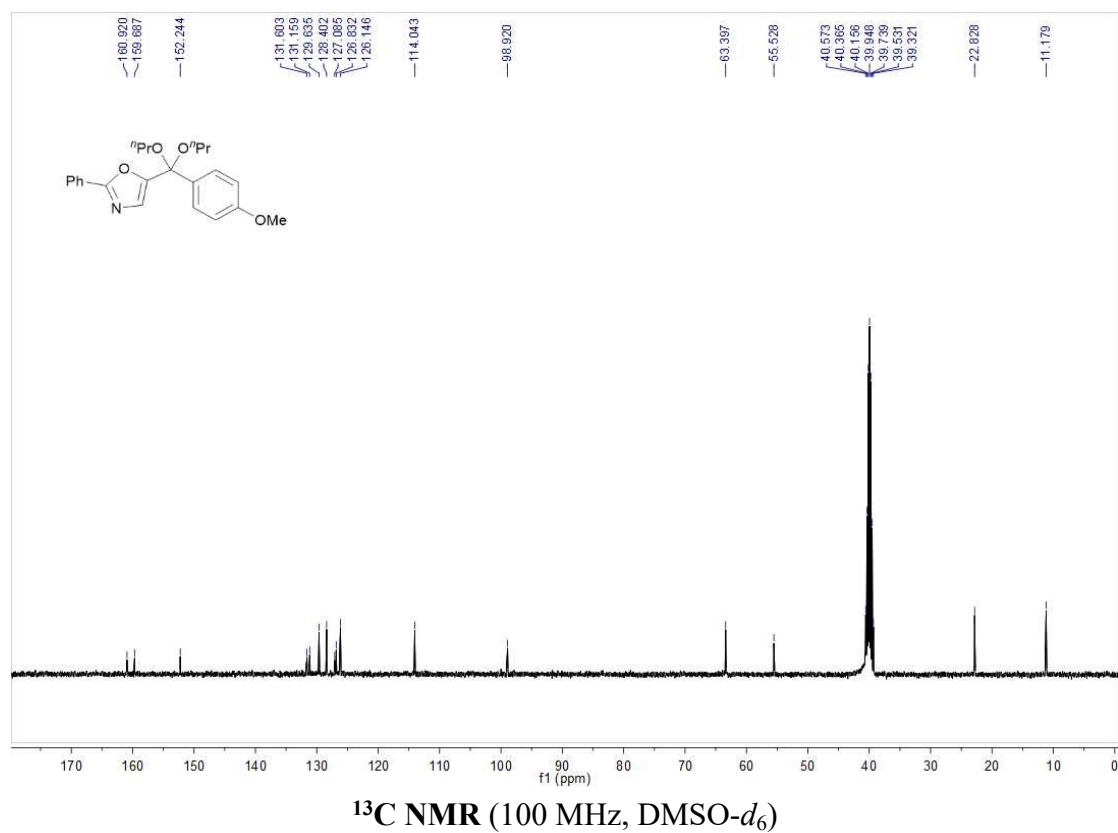

(D) The crystal structure of compound 2m (CCDC: 2258399).

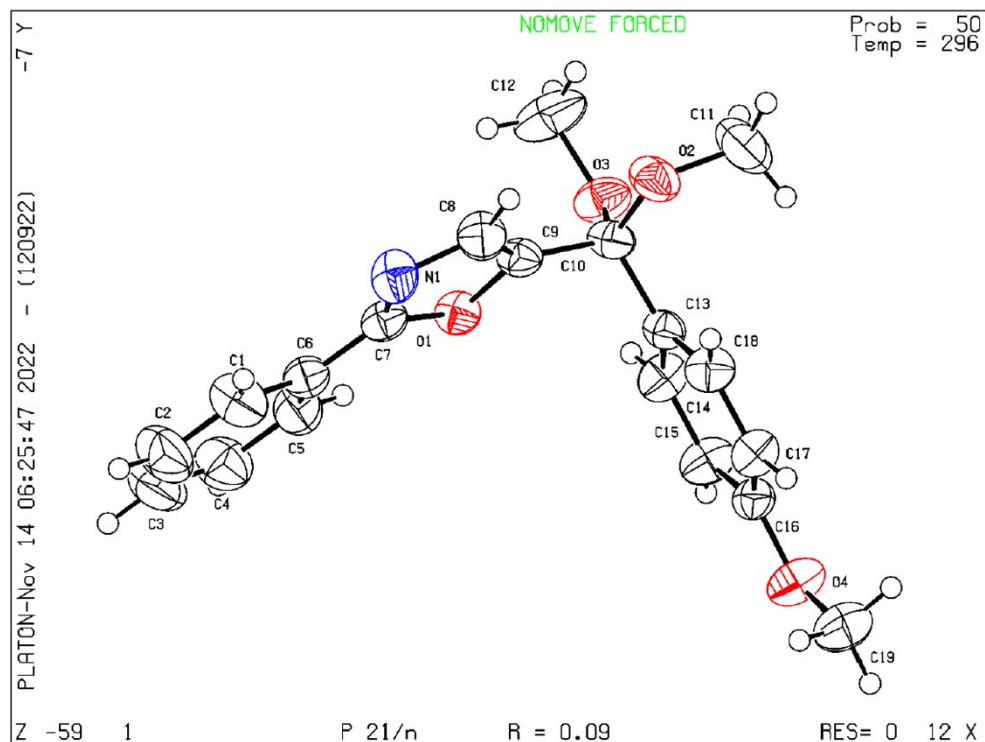

**Datablock: 1**

Bond precision: C-C = 0.0064 Å Wavelength=0.71073

Cell: a=10.662(10) b=15.838(14) c=11.151(10)  
alpha=90 beta=113.116(16) gamma=90

Temperature: 296 K

|                        | Calculated   | Reported     |
|------------------------|--------------|--------------|
| Volume                 | 1732(3)      | 1732(3)      |
| Space group            | P 21/n       | P 21/n       |
| Hall group             | -P 2yn       | -P 2yn       |
| Moiety formula         | C19 H19 N O4 | ?            |
| Sum formula            | C19 H19 N O4 | C19 H19 N O4 |
| Mr                     | 325.35       | 325.35       |
| Dx, g cm <sup>-3</sup> | 1.248        | 1.248        |
| Z                      | 4            | 4            |
| Mu (mm <sup>-1</sup> ) | 0.088        | 0.088        |
| F000                   | 688.0        | 688.0        |
| F000'                  | 688.35       |              |
| h, k, lmax             | 12, 18, 13   | 12, 18, 13   |
| Nref                   | 3053         | 3034         |
| Tmin, Tmax             | 0.979, 0.986 |              |
| Tmin'                  | 0.977        |              |

Correction method= Not given

Data completeness= 0.994 Theta(max)= 24.998

R(reflections)= 0.0857( 1571)

wR2(reflections)=  
0.1428( 3034)

S = 0.951

Npar= 220
